# Supplementary material
Source: PubMed Central journal article supplement (PMC6955363)
Supplement: pnas.1905142117.sapp.pdf [file pnas.1905142117.sapp.pdf]

Supplementary Information for

## The structural bases for agonist diversity in an *Arabidopsis thaliana* glutamate receptor-like channel

Andrea Alfieri, Fabrizio G. Doccula, Riccardo Pederzoli, Matteo Grenzi, Maria Cristina Bonza, Laura Luoni, Alessia Candeo, Neli Romano Armada, Alberto Barbiroli, Gianluca Valentini, Thomas R. Schneider, Andrea Bassi, Martino Bolognesi, Marco Nardini, Alex Costa.

Corresponding authors: Andrea Alfieri (email: [andrea.alfieri@unimi.it](mailto:andrea.alfieri@unimi.it)), Alex Costa (email: [alex.costa@unimi.it](mailto:alex.costa@unimi.it))

### **This PDF file includes:**

- Supplementary Data
- Materials and Methods
- Figures S1 to S18
- Tables S1 to S3
- SI References

1

## 2 SUPPLEMENTARY DATA

3 To strengthen the evidence that binding of amino acids to GLRs underlies the  $[Ca^{2+}]_{cyt}$  increase, we  
4 studied at high spatial resolution, by means of light sheet fluorescence microscopy (LSFM), the  
5 amino acid-elicited  $[Ca^{2+}]_{cyt}$  dynamics in *Arabidopsis* root tip cells of Col-0 plants expressing the  
6 genetically-encoded  $Ca^{2+}$  sensor NES-YC3.6 (1–3) (*SI Appendix, Figs. S2A and S3*). The rationale  
7 behind the choice of the seven analyzed amino acids (*SI Appendix, Fig. S3*) was based on the current  
8 literature (4, 5) and on experiments in which we evaluated, by means of FRET-based wide-field  
9 fluorescence microscopy analyses, the  $[Ca^{2+}]_{cyt}$  transients in *Arabidopsis* root tip in response to the  
10 L-enantiomers of all 20 amino acids (administered at 1 mM final concentration) (*SI Appendix, Fig.*  
11 *S4*). The wide-field experiments revealed that only L-Cys, L-Glu, L-Ala, Gly, L-Ser, L-Asn and, to minor  
12 extent, L-Met were able to trigger  $[Ca^{2+}]_{cyt}$  increases in root tip cells (L-Met evoked a small but clear  
13 FRET signal, that was not detected for any of the remaining 13 amino acids) (*SI Appendix, Figs. S2E*  
14 *and S4*). These results confirm those previously obtained in *Arabidopsis* with an earlier Cameleon  
15 version and/or aequorin-expressing plants (4, 6). Importantly, the use of LSFM offered the necessary  
16 resolution to affirm that the  $[Ca^{2+}]_{cyt}$  transients evoked by the seven different amino acids occurred  
17 primarily in the lateral cells of the root meristem and only later spread towards the inner cells of the  
18 stele (*SI Appendix, Figs. S2A, B and S3*).

19 The GLR3.3 was shown to be required for the amino acid-induced  $[Ca^{2+}]_{cyt}$  increase and PM  
20 depolarization in *Arabidopsis* seedlings (4, 6, 7). We thus analysed the GLR3.3 expression pattern in  
21 *Arabidopsis* seedlings root tip cells through confocal analysis of plants expressing the GLR3.3-EGFP  
22 fusion protein under the control of the GLR3.3 promoter (8) (*SI Appendix, Fig. S2C, C'*). A close  
23 inspection of the GLR3.3 subcellular localization showed an apparent accumulation of the protein  
24 at the basal and apical membranes, but also intracellular punctate assemblies reminiscent of the  
25 endomembrane system (*SI Appendix, Fig. S2C'*) which may include the endoplasmic reticulum (ER).  
26 Such a hypothesis is supported by the presence of GLR3.3 in the ER of phloem sieve elements (9).  
27 Thus our, and previous, results suggest that GLR3.3 might be subjected to a fine subcellular sorting,  
28 as reported in pollen (10) and also for animal AMPARs (11). Indeed, the precise regulation of GLR3.3  
29 subcellular localization in root tip cells will require additional investigations, bearing in mind that  
30 the GFP tag might affect the *in vivo* subcellular localization of the channel. Nevertheless, a side by  
31 side comparison of the GLR3.3-EGFP fluorescence signal with the LSFM  $Ca^{2+}$  imaging (*SI Appendix,*  
32 *Fig. S2A, C*) demonstrated that the GLR3.3 is expressed in those cells where the amino acids-induced  
33  $Ca^{2+}$  transients occur. To unequivocally prove that GLR3.3 is involved in the amino acid-induced  
34  $[Ca^{2+}]_{cyt}$  increases in root tip cells, we expressed the NES-YC3.6 sensor in two different *GLR3.3* T-  
35 DNA lines (*glr3.3-1* and *glr3.3-2*) (4, 6, 7). The comparison of resting  $Ca^{2+}$  levels by means of wide-  
36 field fluorescence microscopy in root tip cells revealed no difference between the wild-type and  
37 mutant alleles (*SI Appendix, Fig. S2D*). Nonetheless, the lack of GLR3.3 completely prevented any  
38 amino acid-induced  $[Ca^{2+}]_{cyt}$  increase assayed by means of wide-field fluorescence microscopy,  
39 whereas the response to external ATP was not affected (*SI Appendix, Fig. S2E, F*). These results  
40 confirm previous observations that GLR3.3 is required for the amino acid response (4, 6, 7) and that  
41 it might be also directly involved in the generation of the  $[Ca^{2+}]_{cyt}$  transients.

42 To assess GLR3.3  $Ca^{2+}$  permeability *in vivo*, we expressed it in the yeast low-affinity  $Ca^{2+}$  uptake-  
43 deficient triple mutant K667, which lacks the vacuolar ATPase (PMC1), the vacuolar exchanger  
44 (VCX1) and the cytosolic regulatory subunit (CNB1) (12–14). Remarkably, the expression of GLR3.3  
45 in the K667 triple mutant complemented the reduced growth of yeast cells at high external  $[Ca^{2+}]$

46 (*SI Appendix, Fig. S5*), hence supporting its direct role in Ca<sup>2+</sup> transport, as previously suggested by  
47 electrophysiological data obtained in mammalian COS-7 cells (10).

## 48 MATERIALS AND METHODS

49 **Plant material and growth conditions.** All *A. thaliana* plants were of the ecotype Columbia 0 (Col-  
50 0). Plants were grown on soil under short day conditions (12 h light /12 h dark, 100  $\mu\text{E m}^{-2} \text{s}^{-1}$  of Cool  
51 White Neon lamps) at 22 °C and 75% relative humidity. Seeds were surface-sterilized by vapor-phase  
52 sterilization (15) and plated on half-strength MS medium (16) (Duchefa) supplemented with 0.1%  
53 sucrose, 0.05% MES, pH 5.8, and 0.8% plant agar (Duchefa). After stratification at 4 °C in the dark  
54 for 2 days, plates were transferred to the growth chamber under long day conditions (16 h light/8 h  
55 dark, 100  $\mu\text{E m}^{-2} \text{s}^{-1}$  of Cool White Neon lamps) at 22 °C. For wide-field imaging the plates were kept  
56 vertically and the seedlings were used 6-7 days after germination. For light sheet fluorescence  
57 microscopy (LSFM) imaging the plates were kept horizontally for 36 hours and the germinated seeds  
58 transferred to the Fluorinated Ethylene Propylene tubes (FEP, Adtech FT2x3) as reported in (3).

59 **Generation of transgenic plants.** Plant transformation of *glr3.3-1* and *glr3.3-2* T-DNA homozygous  
60 mutant alleles (4) with NES-YC3.6 (1) was carried out using *Agrobacterium tumefaciens* GV3101 cells  
61 by floral-dip (15). At least two independent transgenic lines for both alleles were selected based on  
62 the presence of Cameleon fluorescence using a stereo microscope equipped with a GFP filter. To  
63 confirm the presence of T-DNA insertions in homozygosity in the *glr3.3-1* x NES-YC3.6 and *glr3.3-2*  
64 x NES-YC3.6 we followed the genotyping strategy reported in (4).

65 **Confocal laser scanning microscopy.** Confocal microscopy analyses were performed using a Nikon  
66 Eclipse Ti2 inverted microscope, equipped with a Nikon A1R+ laser scanning device (Nikon). EGFP  
67 was excited with the 488 nm laser and the emission was collected at 525-550 nm. Images were  
68 acquired by a CFI Apo LWD 40x WI (N.A. 1.25) and analyzed using FIJI software (<https://fiji.sc/>).

69 **Wide-field fluorescence microscopy.** For wide-field Ca<sup>2+</sup> imaging analyses in *Arabidopsis* root tip  
70 cells, an inverted fluorescence Nikon microscope (Ti-E) with a 20x(N.A. 0.75) was used. Excitation  
71 light was produced by a fluorescent lamp (Prior Lumen 200 PRO, Prior Scientific) set to 20% with  
72 440 nm (436/20 nm) excitation for the Cameleon (YC3.6) sensor. Images were collected with a  
73 Hamamatsu Dual CCD camera (ORCA-D2). The FRET CFP/YFP optical block A11400-03 (emission 1,  
74 483/32 nm for CFP; emission 2, 542/27 nm for FRET) with a dichroic 510-nm mirror (Hamamatsu)  
75 was used for the simultaneous CFP and cpVenus acquisitions. Camera binning was set to 2 x 2 and  
76 exposure times (from 100 to 200 ms) were adjusted depending on the sensor line. Images were  
77 acquired every 5 s. Filters and dichroic mirrors were purchased from Chroma Technology. NIS-  
78 Elements™ (Nikon) was used as a platform to control the microscope, illuminator, and camera.  
79 Images were analyzed using FIJI.

80 **Root tip seedling wide-field fluorescence Ca<sup>2+</sup> imaging.** Seven-day-old seedlings were used for root  
81 Ca<sup>2+</sup> imaging. Seedlings were kept in the growth chamber until the experiment, then were gently  
82 removed from the plate according to (17), placed in the dedicated chambers and overlaid with  
83 cotton wool soaked in imaging solution (5 mM KCl, 10 mM MES, 10 mM CaCl<sub>2</sub> pH 5.8 adjusted with  
84 TRIS). The root was continuously perfused with imaging solution while the shoot was not  
85 submerged. Treatments were carried out by supplementing the imaging solution with 1 mM of  
86 different amino acids (or with lower concentrations where otherwise indicated) or 0.1 mM Na<sub>2</sub>ATP  
87 (sodium adenosine triphosphate) (from a 200 mM stock solution buffered at pH 7.4 with NaOH) and  
88 administered for 3 min under running perfusion.

89 **Light sheet fluorescence microscopy imaging of root tip (LSFM).** For LSFM Ca<sup>2+</sup> imaging analyses in  
90 *Arabidopsis* root tip cells a custom-made setup was used (3, 18). The optical path starts with a single-

91 mode fibre, coupled to a laser emitting at 442 nm (MDL-III-442, CNI), collimated and focalized  
92 through a cylindrical lens ( $f_{Cl} = 50$  mm) in a horizontal plane. A 1× telescope ( $f_1 = f_2 = 50$  mm,  
93 Thorlabs) conjugates the focal plane of the cylindrical lens to the back focal plane of a 10× water-  
94 dipping microscope objective (N.A. 0.3, UMPLFLN 10xW, Olympus), which creates a vertical light-  
95 sheet at the sample level. The light sheet is matched to the field of view of a detection objective  
96 (N.A. 0.5, UMPLFLN 20xW, Olympus) held orthogonally to the excitation axis. For the detection of  
97 the FRET cpVenus/CFP ratio, a two-wavelength detection is required. Thanks to the vertical  
98 geometry of plant roots, it is practical to record two images with different spectral content on the  
99 same detector by splitting the detection path in two spectral channels. To this end, the detection  
100 objective is followed by a 1x relay lens system ( $f_3 = f_4 = 100$  mm, Thorlabs). A vertical slit is placed in  
101 the intermediate image plane with 400  $\mu$ m horizontal size, which corresponds to half of the field of  
102 view. A dichroic filter at 505 nm (DMLP505, Thorlabs) creates two-colour replicas of the sample  
103 image, which are then formed on the detector through two band-pass filters (MF479-40 and MF535-  
104 22 emission filters, Thorlabs), two broadband mirrors (BBSQ1-E02, Thorlabs) and a tube lens (U-TLU-  
105 1-2, Olympus). These create the images of the CFP and the cpVenus fluorescent signals on the two  
106 sides of the CMOS sensor (Neo 5.5 sCMOS, 2560  $\times$  2160 pixels, ANDOR). The laser power was set to  
107 20  $\mu$ W on the sample, which proved not to give relevant photobleaching during the experiment. To  
108 minimize the light dose on the sample, an automatic shutter opens the laser beam only when the  
109 camera is in acquisition mode. A white LED illuminator is used for trans-illumination, for sample  
110 alignment. The sample is held vertically in a custom-made 3D-printed chamber, filled with the  
111 imaging solution. The camera acquisition, sample translation stage and shutter are synchronized via  
112 a custom-made LabVIEW software. This software permits the observation of the two channels, to  
113 visualise their ratio in real time and to record the data. Camera binning was set to 1 x 1 and exposure  
114 times to 100 ms. Images were acquired every 5 s and at every time point a Z-stack of 30 planes  
115 spaced of 3  $\mu$ m was acquired. Images were processed using FIJI by analyzing a single plane of the  
116 time series. To generate the images shown in [SI Appendix, Figs. S2A and S4](#) the cpVenus/CFP  
117 calculated ratio (magenta) was superimposed to the first cpVenus emission image of the time series.

118 **Root tip seedling LSFM Ca<sup>2+</sup> imaging.** Fluorinated ethylene propylene (FEP, Adtech FT2x3) tubes  
119 with an internal diameter of 0.8 mm and manually cut in 3 cm-long pieces using a razor blade, were  
120 cleaned first with 1 M NaOH, then with a diluted NaOH solution (0.5 M) and finally with 70% of  
121 ethanol (18). After washing with 1 M NaOH, a 10 min sonication was performed at each cleaning  
122 step. The tubes were then rinsed with MilliQ water and coupled with the heads of 10  $\mu$ l pipette tips  
123 (manually cut), placed into cleaned pipette tip boxes and afterwards autoclaved at 121 °C for 20  
124 min. The FEP tubes were then filled with the MS/2 medium used for the seed germination but in  
125 this case jellified with 0.5% Phytigel™ (w/v) (Duchefa) instead of plant agar (3, 18, 19). The tubes  
126 were filled from the bottom of the tubes using a P200 micropipette. To prevent the evaporation of  
127 water from the Phytigel™-based medium the top of the tubes was covered with a plant agar-based-  
128 medium plug, thus creating a small cap. After solidification, a sterilized scalpel was used to remove  
129 the exceeding cap medium. After seedlings germination and fluorescence inspection with a stereo  
130 microscope, the fluorescent seeds were quickly moved from the plate to the top of the tubes to  
131 avoid root drying, using sterilized pliers and without clamping them. Seedlings were placed over the  
132 top of the tubes, so the plantlets could grow inside the filled tubes. The tubes were transferred to a  
133 tip box that was finally filled with MS/2 liquid medium without sucrose and sealed to avoid  
134 contamination. To mount the tubes with the plant in the imaging chamber, we used a custom-made  
135 holder (3, 18) consisting of a hollow aluminium tube in which a pipette tip can be attached. The  
136 seedlings were let grow until the root tip emerged from the FEP tubes (7/8-day-old). When plants  
137 were ready to be imaged, we plugged the pipette tip with the tube into the hollow tube, and quickly  
138 moved the whole holder to the imaging chamber of the LSFM setup filled with imaging solution (5

139 mM KCl, 10 mM MES, 10 mM CaCl<sub>2</sub> pH 5.8 adjusted with TRIS), fixing it on a rotation and translation  
140 stage for the sample positioning. This procedure prevents any kind of damage or major stress to the  
141 root and maintains the seedling vertical. For the analysis of spatiotemporal dynamics of the [Ca<sup>2+</sup>]  
142 variation, a volume of 120 μL (100X) for each tested amino acid was directly added to one corner of  
143 the imaging chamber (filled with 12 mL of imaging solution). The final concentration of the stimuli  
144 was 1 mM. The ratio images are representative of n = 3 experiments.

145 **Quantitative imaging analysis.** Fluorescence intensity was determined over regions of interest  
146 (ROIs), which corresponded to the meristematic cells of the root tip. cpVenus and CFP emissions  
147 were used for the ratio (R) calculations (cpVenus/CFP) and, where suitable, normalized to the initial  
148 ratio (R<sub>0</sub>) and plotted versus time ( $\Delta R/R_0$ ). For wide-field imaging background subtraction was  
149 performed independently for both channels before calculating the ratio. Kymograph was generated  
150 with the FIJI plugin using the yellow line reported in *SI Appendix, Fig. S2A*.

151 **Yeast growth complementation assay.** *Saccharomyces cerevisiae* strain K667 (vcx1/ $\Delta$ , cnb1::LEU2,  
152 pmc1::TRP1) (12) was transformed with pYES2-URA empty vector (Invitrogen) or pYES2-URA  
153 harboring the *GLR3.3* coding sequence (10) in the BamHI/EcoRI sites. The same vector harboring the  
154 *Arabidopsis CCX2* (cation/Ca<sup>2+</sup> exchanger 2) (14) was used as positive control. Transformants were  
155 selected for uracil prototrophy as reported in (20). For complementation studies, single URA-plus  
156 colonies were grown in SC-URA medium containing 2% (w/v) glucose (SD), pelleted, washed twice  
157 with sterile water and diluted to an OD<sub>600</sub> of 0.1. Three μl of a 10-fold dilution were spotted onto  
158 SC-URA plates containing 2% (w/v) galactose (SG) supplemented with 1, 300 or 500 mM CaCl<sub>2</sub> and  
159 incubated at 30 °C for 3-5 days. All media were supplemented with 50 mM succinic acid/Tris (pH  
160 5.5), 0.7% (w/v) yeast nitrogen base without ammonium sulfate, to prevent precipitation of Ca<sup>2+</sup>,  
161 and 5 g/L NH<sub>4</sub>Cl.

162 **Cloning of the GLR3.3 LBD construct.** The DNA portions codifying for *AtGLR3.3* S1 (residues 463-  
163 570) and S2 (residues 681-813) segments were amplified, joined by overlapping PCR (with the  
164 concomitant introduction of a Gly-Gly-Thr interspacing linker) and cloned into a pETM-14 vector  
165 (EMBL, Heidelberg, Germany) to produce an N-terminally histidine-tagged construct for expression  
166 in *E. coli*. Although a 2-residue linker is regularly reported in the literature for LBD constructs, a 3-  
167 residue Gly-Gly-Thr linker was designed because expected to be better accommodated in the crystal  
168 packing, in the light of *in silico* predictions of *AtGLR3.3* LBD secondary structure and careful  
169 alignment of the *AtGLR3.3* sequence with sequences from deposited LBD structures (using *Jalview*)  
170 (21).

171 **Production and purification of the native protein (GLR3.3 LBD).** Rosetta strain *E. coli* cells (Novagen,  
172 Merck Biosciences) were transformed with the above described pETM-14: *AtGLR3.3* LBD plasmid  
173 and grown at 37 °C in LB medium (supplemented with kanamycin and chloramphenicol) up to OD<sub>600</sub>  
174 of 0.6-0.8. After cooling down the cultures at room temperature for 20 min, isopropyl β-D-1-  
175 thiogalactopyranoside (IPTG) was added to a final concentration of 0.1 mM and the growth  
176 continued at 20 °C for 16 h. The pelleted cells were resuspended in a buffer containing 50 mM  
177 TrisHCl pH 8.0, 500 mM NaCl, 15 mM imidazole, 2 mM β-mercaptoethanol, cComplete™ EDTA-free  
178 protease inhibitor cocktail (Roche), 0.5 mM L-Glu or Gly. All buffers were supplemented with 0.5  
179 mM L-Glu or Gly throughout purification to ensure stabilization of the construct. After sonication  
180 and centrifugation, the resulting supernatant was applied onto a nickel column (HisTrap FF, GE  
181 Healthcare). The imidazole-eluted sample was mixed with home-made His-tagged human rhinovirus  
182 3C protease (protease:target protein molar ratio ≈ 1:600) and dialyzed overnight in a dialysis tube  
183 (SpectrumLabs, cutoff 4 kDa) to allow for tag cleavage and imidazole removal. The following day, a  
184 second passage through the nickel column was performed to separate the sample from both the  
185 tag and the protease and in the final size-exclusion chromatography column (Superdex200 10/300



186 GL, GE Healthcare) the 27kDa protein eluted as a symmetric peak compatible with either a monomer  
187 or a dimer (*SI Appendix, Fig. S8A*). A dynamic light scattering experiment showed that >99% of the  
188 protein in solution is monomeric (*SI Appendix, Fig. S8C*). Typical yields were of about 25 mg per liter  
189 of culture. The sample was monitored throughout purification by SDS-polyacrylamide gel  
190 electrophoresis and spectrophotometry. The final protein construct included 3 post-cleavage N-  
191 terminal residues (Gly-Pro-Met) immediately followed by Gly1 (see *SI Appendix, Figs. S6 and S7* for  
192 construct sequence numbering) and was stored in the final size-exclusion chromatography buffer  
193 (10 mM HEPES pH 7.5, 150 mM NaCl, 0.5 mM EDTA, 0.5 mM L-Glu).

194 **Production and purification of selenomethionine-substituted GLR3.3 LBD.** Rosetta cells  
195 transformed with the same plasmid described above were grown in minimal M9 medium to OD<sub>600</sub>  
196 of 0.3, supplemented with a cocktail of amino acids including L-selenomethionine, induced by 0.2  
197 mM IPTG 15 min later and grown at 25 °C for 30 h, according to a metabolic inhibition protocol (22).  
198 Purification procedures were identical to the ones used for the native protein, except for the  
199 inclusion of 20 mM β-mercaptoethanol in all buffers. The incorporation of selenium was assessed  
200 on crystals right before data collection by analysis of the X-ray fluorescence emission spectra.

201 **Dynamic light scattering.** Measurement was performed on a Puck instrument (Unchained Labs) on  
202 GLR3.3 LBD + L-Glu at 1 mg/mL (37 μM) in 10 mM HEPES pH 7.5, 150 mM NaCl, 0.5 mM EDTA, 0.5  
203 mM L-Glu, at 20 °C.

204 **Dialysis to produce the apo protein.** The final protein was expected to contain the amino acid ligand  
205 supplemented during purification (L-Glu or Gly) and for this reason was subjected to extensive  
206 dialysis against the storage buffer to force the complete release of the ligand (1:150 sample dilution  
207 in 8x 6h-passages, giving a final dilution of 10<sup>17</sup>); the protein sample obtained was used in the  
208 binding assays. Turbidity of the sample and heavy precipitation reproducibly occurring after 3-4  
209 dialysis steps strongly suggested a holo to apo transition; apo *AtGLR3.3* LBD was invariably more  
210 unstable than the holo (L-Glu or Gly) form, displaying lower solubility and shorter storage life.

211 **Circular dichroism.** Circular dichroism experiments were carried out on a J-810 spectropolarimeter  
212 (JASCO Corp.) equipped with a Peltier system for temperature control. All data were collected on  
213 0.2 mg/mL (7 μM) protein solutions in 10 mM HEPES pH 7.5, 150 mM NaCl and 0.5 mM EDTA (± 0.5  
214 mM L-Glu), placed in a cuvette with a path length of 0.1 cm. Spectra were recorded from 260 to 200  
215 nm. Temperature ramps were monitored at 220 nm while temperature was increased from 20 to  
216 95 °C at 1 °C/min. T<sub>m</sub> was calculated as the first-derivative maximum of the temperature ramps.

217 **Binding assays by microscale thermophoresis.** The assays were performed on a Monolith NT.115  
218 instrument (NanoTemper Technologies). To prepare the experiment, GLR3.3 LBD or GLR3.3 LBD  
219 S13A,Y14A in their apo form were conjugated to a fluorophore targeting surface lysines (Monolith  
220 Protein Labeling Kit RED-NHS, NanoTemper Technologies) and separated from the dye excess using  
221 desalting columns. The GLR3.3 LBD construct possesses 14 surface lysines, resulting in a satisfactory  
222 and reproducible conjugation process. Each curve was produced at 24 °C by the thermophoretic  
223 signal of 16 capillaries (MST power 40%) containing a fixed concentration of labelled protein (100  
224 nM) and increasing concentrations of ligand, in 10 mM HEPES pH 7.5, 150 mM NaCl, 0.5 mM EDTA,  
225 0.05% Tween20. All measurements recorded strong thermophoretic signals (response amplitudes  
226 between 4 and 15, signal to noise ratios between 8 and 13, in line with what is expected for  
227 unambiguous results with this technique), generating well-defined sigmoidal curves reaching  
228 plateau. For the control experiments in *SI Appendix, Fig. S10*, the fluorescent target (Cy5-labelled  
229 aptamer) specifically supplied by NanoTemper for the instrument was tested versus its ligand (AMP)  
230 and three of GLR3.3 amino acid ligands. All data were averaged and fit by the instrument software  
231 MO. Affinity Analysis (NanoTemper) according to the following formula:

$$F = U + \frac{(B - U) \cdot ([ligand] + [protein] + K_d - \sqrt{([ligand] + [protein] + K_d)^2 - 4 \cdot [ligand] \cdot [protein]})}{2 \cdot [protein]}$$

232

233 where F is the fraction of protein bound to the ligand, while U and B represent the response values  
 234 (normalized fluorescence) of the unbound and bound states, respectively. A general review on this  
 235 technique is available in (23), along with considerations about controls in (24). Successful application  
 236 of this technique to LBDs of iGluRs is reported in the literature (25).

237 **Crystallizations.** Crystallization screens were performed on an Oryx robot (Douglas Instruments) by  
 238 the sitting drop vapor diffusion method and manually refined by the hanging drop technique. GLR3.3  
 239 LBD (native or SeMet-substituted) purified in the presence of L-Glu or extensively dialyzed GLR3.3  
 240 LBD supplemented with 3 mM L-Cys or Gly or L-Met was mixed 2:1 at initial concentration of 12  
 241 mg/mL (445  $\mu$ M) with commercial solutions (Hampton Research) in Greiner Bio-One plates and  
 242 incubated at 20 °C. Hits showed up within 7 days. GLR3.3 LBD + L-Glu crystals were subsequently  
 243 optimized to the final reservoir condition 100 mM sodium acetate pH 4.6, 240 mM ammonium  
 244 sulfate, 30% (w/v) PEG monomethyl ether 2,000. For GLR3.3 LBD + Gly or L-Cys or L-Met, initial  
 245 crystals were directly used for data collection and were obtained in the following conditions: (+ Gly)  
 246 100 mM sodium citrate tribasic pH 5.6, 2 M ammonium sulfate, 200 mM potassium sodium tartrate;  
 247 (+ L-Cys or + L-Met) 100 mM HEPES pH 7.5, sodium citrate tribasic 1.4 M. SeMet-substituted GLR3.3  
 248 LBD gave crystals in 100 mM MES pH 6.5, 200 mM ammonium sulfate, 20% (w/v) PEG 8,000. All  
 249 cryoprotectants were prepared by adding 25% (v/v) glycerol to the reservoir solution.

250 **Data collections and structure solution.** Statistics for data collection, phasing and refinement are  
 251 summarized in [SI Appendix, Table S1](#). For both the native GLR3.3 LBD + L-Glu and the SeMet GLR3.3  
 252 LBD + L-Glu datasets, diffraction data were collected at 100K on the ID29 beamline (26) at the  
 253 European Synchrotron Radiation Facility, Grenoble (France) using the Pilatus 6M-F pixel detector  
 254 (Dectris). The native data set was collected at a wavelength of 1.000 Å and initially indexed in space  
 255 group C2 with a resolution of 2.0 Å; the anomalous data set was collected close to the Se K-edge at  
 256 0.979 Å and showed a tetragonal space group (P4<sub>3</sub>2<sub>1</sub>2) with a resolution of 2.4 Å. The datasets for  
 257 GLR3.3 LBD + Gly, L-Cys and L-Met (all in the orthorhombic space group P2<sub>1</sub>2<sub>1</sub>2<sub>1</sub>, with resolutions of  
 258 1.6 Å, 2.5 Å and 3.1 Å, respectively) were collected remotely at 100K at the Diamond Light Source  
 259 (Didcot, UK) on the Eiger2 X 16M detector (Dectris) of beamline I04 at a wavelength of 0.9795 Å.  
 260 Several applications from the *CCP4* suite were used throughout processing (27) ([SI Appendix, Table](#)  
 261 [S1](#)). Diffraction data were processed using *XDS* (28) and scaled and merged with *AIMLESS* (29); the  
 262 high-resolution data cut-off was based on the statistical indicators CC<sub>1/2</sub> and CC\* (30). Molecular  
 263 replacement (MR) was initially attempted with no success on the native L-Glu dataset with standard  
 264 software, using search models identified through *BLAST*, *PSI-BLAST* (31), *FFAS* (32) or rationally  
 265 edited LBD models based on the large number of bacterial and eukaryotic GLR LBDs structures  
 266 available from the Protein Data Bank; pruning of the solvent-exposed loops and sequential use of  
 267 either of the two lobes of known LBDs were tested in MR, producing in some cases partial solutions  
 268 that did not improve after subsequent manipulation. The observation that the *AtGLR3.3* LBD reflects  
 269 the topological arrangement of known LBDs with a substantial displacement in the C $\alpha$  trace (more  
 270 pronounced in domain 2) provides a possible *a posteriori* explanation for these failures.  
 271 Experimental phasing on the SeMet dataset was first attempted with various standard software with  
 272 no success, at least in our hands. The phase problem was finally solved by MRSAD phasing (33, 34),  
 273 by which approximate experimental phases, obtained by locating some of the selenium atoms and  
 274 successively improved by density modification, allowed to build a partial model; phases extracted  
 275 from this model were then combined with the initial anomalous phases to produce a more accurate  
 276 set of phases and an improved electron density map, as described more in detail below. A highly  
 277 fragmented and partially wrong model was firstly obtained by the *CRANK2* experimental phasing

278 pipeline (35, 36), using the SeMet dataset as both native and anomalous input: decreasing R-factor  
279 during the initial model building and refinement, as well as  $R_{\text{free}} < 0.50$ , good electron density for  
280 some parts of the structure and accordance between the position of some of the SeMet residues  
281 and the anomalous map led to consider the model as a partial, promising solution, albeit fragmented  
282 and incorrect in several parts. The model was then gradually improved by extensive model building  
283 with the *BUCCANEER* software (37) and the geometry of the model and the quality of the electron  
284 density map were improved with *BUSTER* (38, 39). Subsequent MRSAD-phasing in ‘rebuild mode’ in  
285 *CRANK2* (36) using the *BUSTER* model and the anomalous dataset improved the map; the number  
286 of substructure improvement iterations and the number of model building cycles were increased to  
287 5 and 15, respectively (compared to the default *CRANK2* values); all expected SeMet in the model  
288 were in agreement with the map. Simulated annealing refinement by *phenix.refine* (40) was then  
289 used to improve the geometry and the obtained model was placed into the unit cell of the native  
290 data (L-Glu dataset) by MR with *MOLREP* (41). For the subsequent model building of the native L-  
291 Glu dataset, the P1 space group was chosen because of better data statistics compared to the  
292 alternative monoclinic C2 assignment, good overall completeness of the data and the presence of  
293 only two molecules in the unit cell. The model was refined against native data by iterative rounds  
294 of *REFMAC5* restrained refinement (42), *phenix.refine* and manual editing in *Coot* (43). During  
295 refinement, additional positive density observed in both cavities in the  $2|F|_o - |F|_c$  and  $|F|_o - |F|_c$  electron  
296 density maps allowed to unambiguously identify the L-Glu ligand (Fig. 2B-E and *SI Appendix, Fig.*  
297 *S11A-D*). Water molecules were added with *ARP/wARP* (Solvent module) (44) and the final  
298 stereochemistry was assessed by *MolProbity* (<http://molprobity.biochem.duke.edu/>) (45). MR by  
299 *MolRep* (41) using the ligand-deprived L-Glu structure allowed to obtain the Gly, L-Cys and L-Met  
300 structures. The presence of the ligands was confirmed by bias-reduced simulated-annealing OMIT  
301 maps generated through the *PHENIX* suite (40). All 14 individual chains from the four crystal  
302 structures display an excellent structural match in their C $\alpha$  traces (max rmsd 0.55 Å); the only  
303 significant difference is confined to the C-terminal stretch Lys240-Thr244 (including Cys243, which  
304 forms a disulfide bridge with Cys179), whose density has two alternative traces in 4 out of 14 chains  
305 and is absent in the rest: however, in almost all cases the density for the disulfide bridge is  
306 detectable. For the L-Met dataset, a moderate degree of anisotropy was detected and therefore the  
307 reflection data were subjected to ellipsoidal truncation and anisotropic scaling through the UCLA  
308 Diffraction Anisotropy Server (<http://services.mbi.ucla.edu/anisotropy/>) (46); moreover, 29  
309 residues in the chain B of the L-Met-bound structure (all comprised in domain 2) displayed missing  
310 or very poor density and therefore were not modelled.

311 **Preparation of figures.** All structural representations and superpositions were prepared with  
312 *PyMOL* (The PyMOL Molecular Graphics System, Version 1.3 Schrödinger, LLC).

313 **Site-directed mutagenesis.** All mutations listed in *SI Appendix, Table S2* were obtained using  
314 QuikChange Site-Directed Mutagenesis Kit (Stratagene) on the above described pETM-14: *AtGLR3.3*  
315 LBD plasmid and sequence-verified.

316 **Expression tests of GLR3.3 LBD mutants.** Each of the plasmids bearing a mutant version of GLR3.3  
317 LBD was transformed into Rosetta strain *E. coli* cells. Small-scale (10 mL) cultures were grown at 37  
318 °C in LB medium (supplemented with kanamycin and chloramphenicol) up to OD<sub>600</sub> of 0.6-0.8. After  
319 that, they were subjected to either expression condition 1 (induction by 1 mM IPTG followed by  
320 shaking at 37 °C for 3 h) or 2 (induction by 0.1 mM IPTG followed by shaking at 20 °C for 16 h). The  
321 pelleted cells were then subjected to a shortened small-scale purification protocol limited to  
322 sonication and centrifugation, and samples for SDS-PAGE analysis were taken. A wild-type version  
323 of GLR3.3 LBD was included in all tests as positive control.



324 **Homology modelling.** All models were generated using the online server SWISS-MODEL  
325 ([swissmodel.expasy.org](http://swissmodel.expasy.org)) (47) providing the GLR3.3 LBD + L-Glu structure as input. Final model  
326 quality was assessed by the *MolProbity* score and QMEAN Z-score included in SWISS-MODEL  
327 calculations (see *SI Appendix, Table S3* for details). To generate the GLR3.3 LBD-based models, the  
328 following residues from separate S1 and S2 segments (interspaced with the GGT linker) were used:  
329 GLR1.2, residues 441-547, 655-776 (numbered 1-232 in Fig. 3C); GLR1.4, residues 445-555, 663-785  
330 (numbered 1-237 in Fig. 3D); GLR3.1, residues 469-575, 686-808; GLR3.4, residues 493-597, 708-836  
331 (numbered 1-237 in Fig. 3B); GLR3.5, residues 487-590, 701-828. For the UniProt KB accession  
332 numbers of AtGLR isoforms, see 'Sequence alignments' in this Appendix.

333 **Pocket volume calculations.** The CASTp software (<http://sts.bioe.uic.edu/castp/>) (48) was used to  
334 calculate the Connolly's solvent-excluded volume of the binding pocket, corresponding to the  
335 volume of the cavity contained within the contact molecular surface. The calculations were  
336 performed on the two datasets with best resolution, producing similar results: 196 Å<sup>3</sup> for the GLR3.3  
337 + L-Glu pocket and 189 Å<sup>3</sup> for the GLR3.3 + Gly pocket.

338 **Sequence alignments.** Protein sequence alignments were performed with ClustalOmega  
339 (<https://www.ebi.ac.uk/Tools/msa/clustalo/>) (49). However, all alignments were manually  
340 corrected after careful inspection of the superimposed structures. All final figures of alignments  
341 were prepared with ESPript (<http://esprict.ibcp.fr>) (50). UniProtKB primary accession numbers  
342 (<https://www.uniprot.org/>) of all protein sequences used in the alignments are: AtGLR1.1 Q9M8W7,  
343 AtGLR1.2 Q9LV72, AtGLR1.3 Q9FH75, AtGLR1.4 Q8LGN1, AtGLR2.1 O04660, AtGLR2.2 Q9SHV1,  
344 AtGLR2.3 Q9SHV2, AtGLR2.4 O81776, AtGLR2.5 Q9LFN5, AtGLR2.6 Q9LFN8, AtGLR2.7 Q8LGN0,  
345 AtGLR2.8 Q9C5V5, AtGLR2.9 O81078, AtGLR3.1 Q7XJL2, AtGLR3.2 Q93YT1, AtGLR3.3 Q9C8E7,  
346 AtGLR3.4 Q8GXJ4, AtGLR3.5 Q9SW97, AtGLR3.6 Q84W41, AtGLR3.7 Q9SDQ4; *DmGluR1A* Q03445;  
347 *AvGluR1* E9P5T5; *RnGluA2* P19491; *HsGluK1* P39086; *HsGluN2A* Q12879; *EcGlnBP* P0AEQ3; *SsGluR0*  
348 P73797; *OsGLR3.1* Q7XP59. Of those sequences for which a UniProtKB record is not available, the  
349 entry in the NCBI Protein database (<https://www.ncbi.nlm.nih.gov/protein>) is: *PpGLR1*  
350 XP\_024390787.1; *BrGLR3.4* XP\_009118614.1. For *Gin\_bil2* (*Ginkgo biloba* putative GLR2) the  
351 sequence of isoform 8 (locus 13956) is taken from (51).

352 **Statistical analysis.** All the data are representative of at least  $\geq 3$  experiments. Reported traces are  
353 averages of traces from all single experiments used for the statistical analyses. Results are reported  
354 as averages  $\pm$  standard deviations (SD). Statistical significance was assayed by Student t test and  
355 validated using One-way ANOVA (ANalysis Of VAriance) and post-hoc Tukey HSD (Honestly  
356 Significant Difference) tests.

A

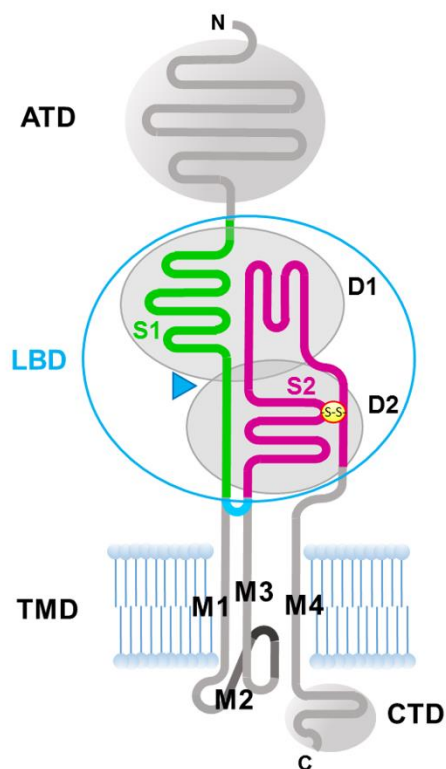

B

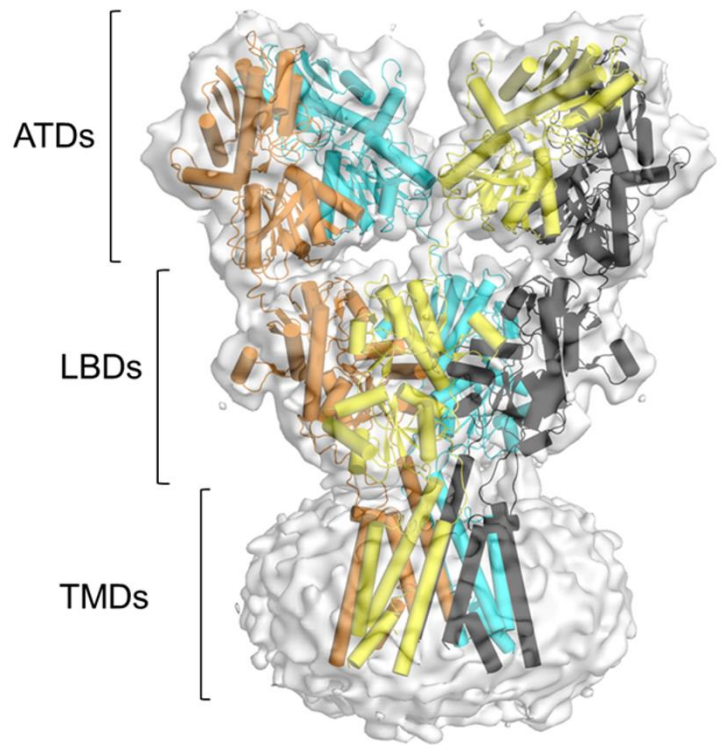

357

358

359 **Fig. S1.** Structure of iGluR/GLR channels. (A) General representation of one eukaryotic iGluR/GLR  
 360 subunit. The functional channel is a homo- or heterotetramer of this subunit. Segment S1 is  
 361 represented in green, S2 in magenta. The bilobed ligand-binding domain (LBD) is made up of  
 362 domains 1 and 2 (D1 and D2); D1 residues are mainly contributed by segment S1 and D2 residues  
 363 are mainly contributed by segment S2. The ligand (blue triangle) sits in a cleft between D1 and D2.  
 364 The blue boundary encloses the *AtGLR3.3* LBD construct described in this work, with an arch  
 365 indicating the site of the linker junction. The disulfide bridge (mostly conserved in eukaryotes) ties  
 366 the final stretch of S2 to the D2 core. ATD, aminoterminal domain; M1 to M4: transmembrane  
 367 segments of the transmembrane domain (TMD); CTD, C-terminal domain. (B) View of  
 368 homotetrameric GluA2 (rat AMPA-subtype iGluR; PDB ID 5kbv, EMD ID 8232) (52). The 6.8-Å  
 369 resolution cryo-EM map is shown as transparent surface and the four subunits of the model are  
 370 shown in different colors with cylinder representation of  $\alpha$ -helices. A is the general scheme of each  
 371 one of these four subunits. Figure produced with *PyMOL* (The PyMOL Molecular Graphics System,  
 372 Version 1.3 Schrödinger, LLC) from publicly available data.

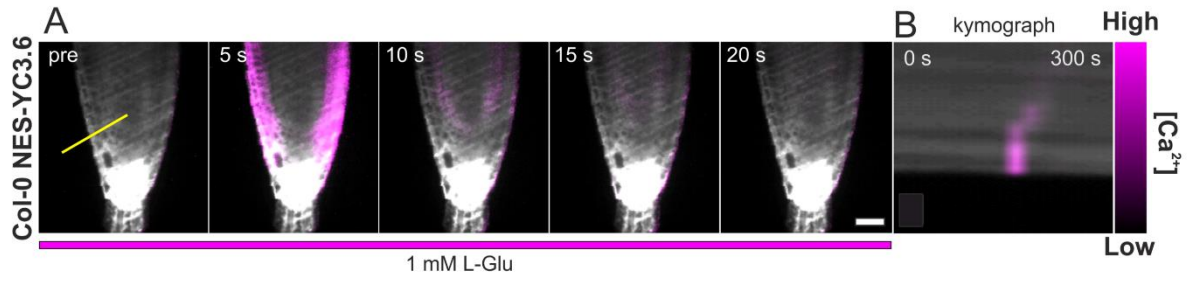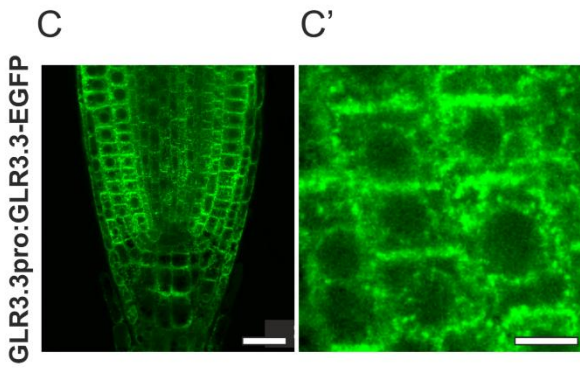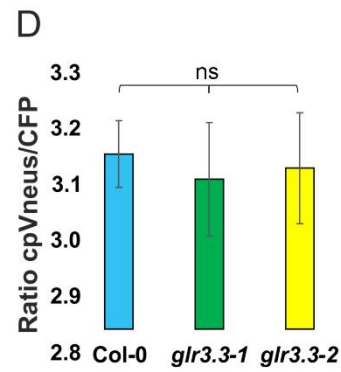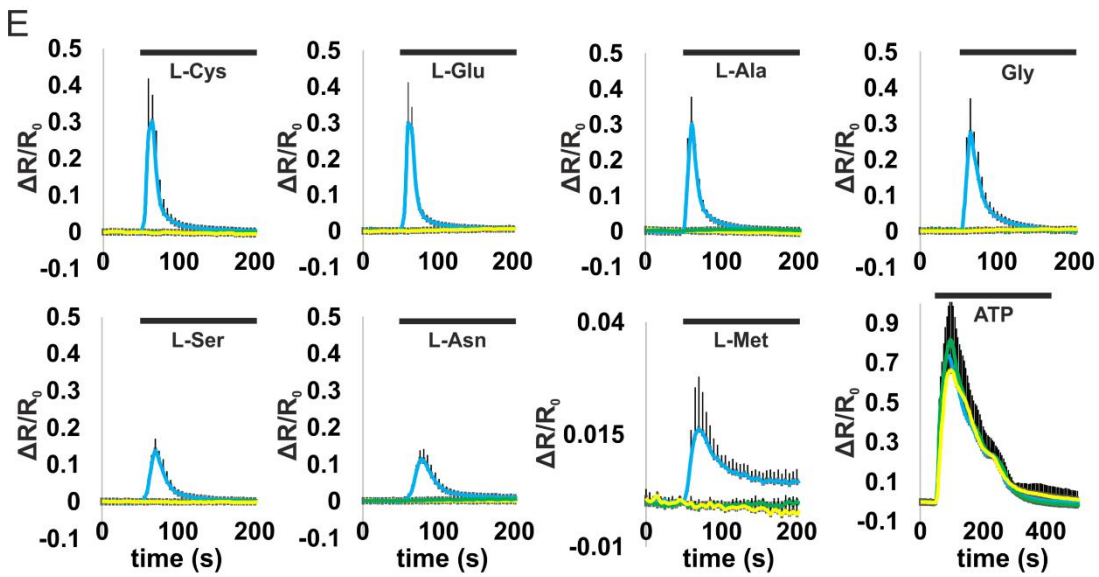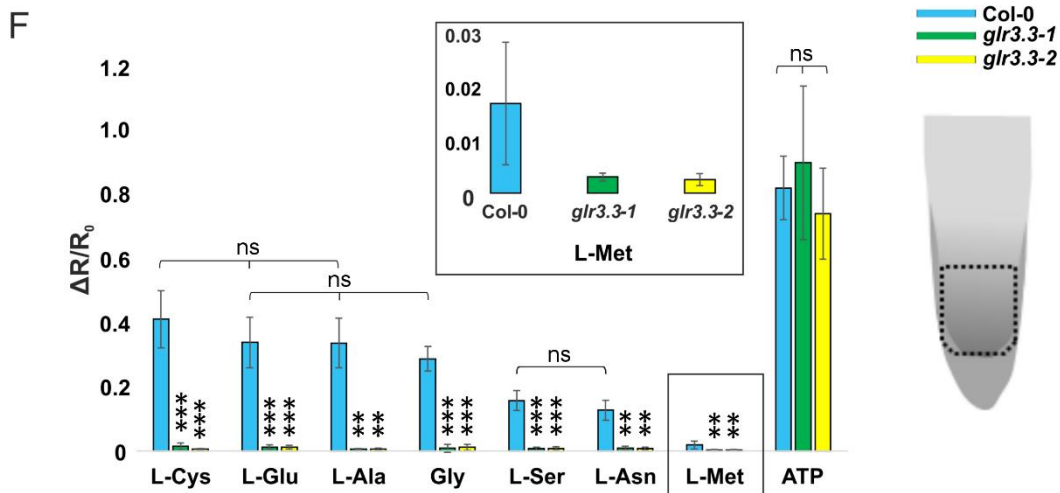

374 (previous page)

375 **Fig. S2.** Amino acid-induced  $[Ca^{2+}]_{cyt}$  increase in *A. thaliana* root tip cells depends on GLR3.3 activity.  
376 (A) Ratiometric purple-color images superimposed to cpVenus images from a representative time  
377 series of *Arabidopsis* Col-0 root tips expressing NES-YC3.6 treated with 1 mM of L-Glu visualized by  
378 LSM. The number in each image indicates the time passed after acquisition start in seconds. Scale  
379 bar = 25  $\mu$ m. (B) Kymograph analysis (performed on the yellow line of 1 pixel-width) showing the  
380 progression of the L-Glu-induced  $[Ca^{2+}]_{cyt}$  increase with signal percolation from lateral root cells to  
381 the stele. (C) Confocal image of a representative root tip meristem of an *Arabidopsis* seedling  
382 expressing the GLR3.3-GFP (green color in the image) chimeric protein driven by the GLR3.3  
383 promoter. Scale bar = 25  $\mu$ m. (C') Magnification of root meristem cells shown in C. Scale bar = 5  $\mu$ m.  
384 (D) Steady state cpVenus/CFP ratios of the Region Of Interest (ROI) (corresponding to the area  
385 indicated within the black dashed line in the schematic drawing at the right bottom of the figure) in  
386 root tip cells imaged under continuous perfusion preceding (averaged over 50 sec time window)  
387 amino acid treatments of Col-0 (light blue), *glr3.3-1* (green) and *glr3.3-2* (yellow) knock out alleles;  
388  $n \geq 8$ ; ns: not statistically significant. (E) Root tips of seedlings expressing NES-YC3.6 in Col-0, *glr3.3-1*  
389 and *glr3.3-2* imaged as in D treated with 1 mM of L-Cys, L-Glu, L-Ala, Gly, L-Ser, L-Asn, L-Met and  
390 0.1 mM of external ATP. The same ROI as in D in the root tip meristematic zone was analyzed and  
391 plotted over time for the averaged cpVenus/CFP ratio  $\pm$  SD. The black line above the graphs indicates  
392 the amino acid or ATP exposure. (F) Maximal relative amplitude of cpVenus/CFP ratio as  $\Delta R/R_0$   
393 increase triggered by amino acids and ATP administration in the three analyzed genotypes. Inset:  
394 magnification of 1mM L-Met maximum response;  $n \geq 4$ ; error bars  $\pm$  SD; \*\*  $p < 0.005$ , \*\*\*  $p < 0.0005$ ;  
395 (Student t test); ns: not statistically significant; SD = standard deviation.

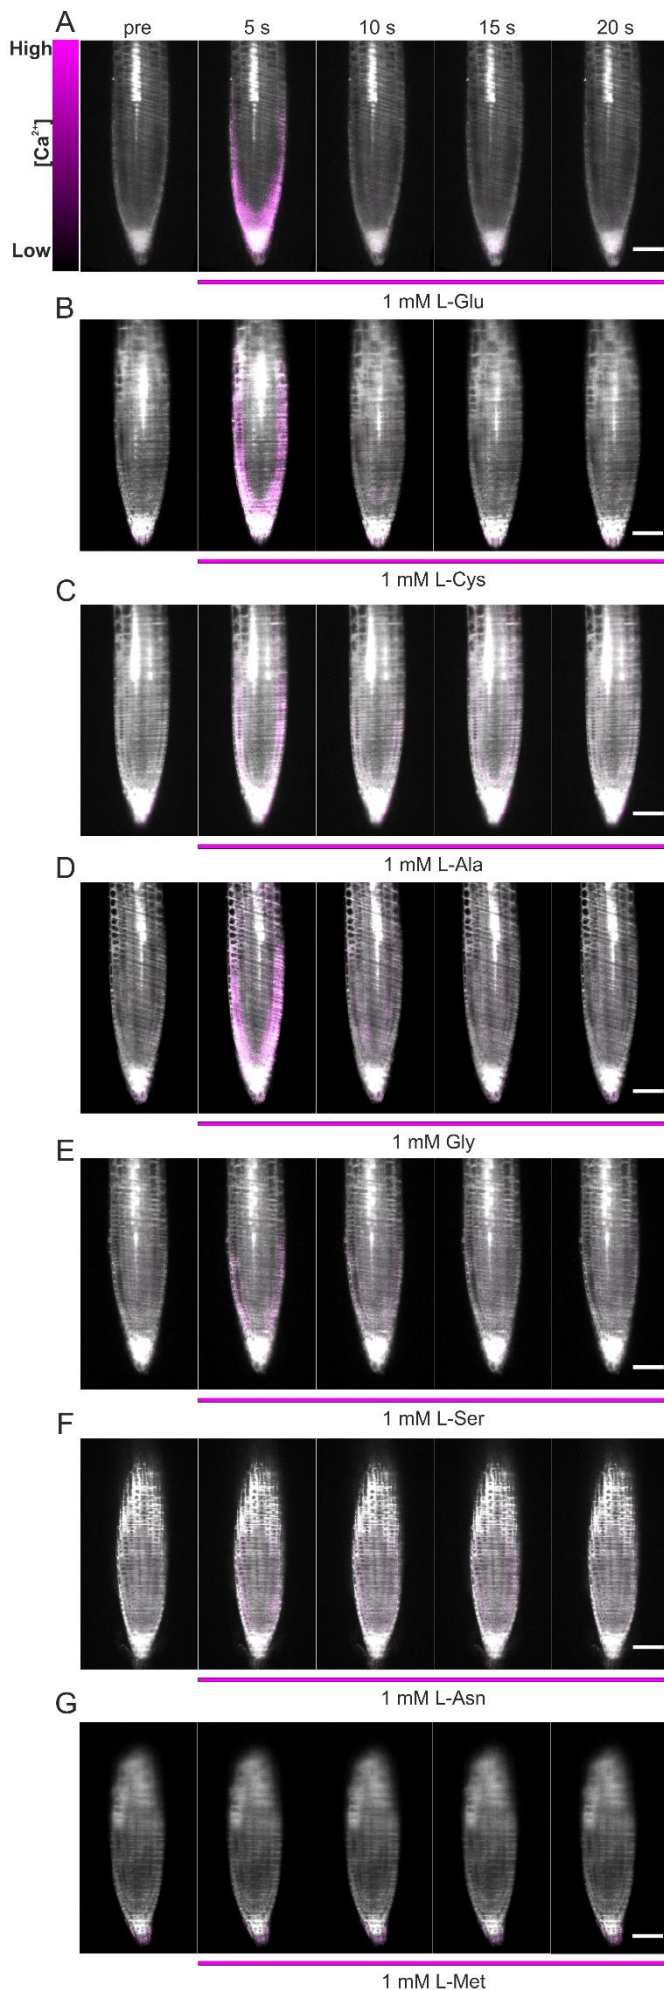

396 **Fig. S3.** Ratiometric purple-color images  
 397 superimposed to cpVenus images from  
 398 a representative time series visualized  
 399 by LSM of *Arabidopsis* Col-0 root tips  
 400 expressing NES-YC3.6 treated with the 7  
 401 different amino acids used for the  
 402 experiments shown in *SI Appendix, Fig.*  
 403 *S2E*. The different time series show  
 404 cpVenus/CFP ratio changes in response  
 405 to 1 mM L-Glu (A), 1 mM L-Cys (B), 1 mM  
 406 L-Ala (C), 1 mM Gly (D), 1 mM L-Ser (E),  
 407 1 mM L-Asn (F), 1 mM L-Met (G).  
 408 Numbers in the images indicate the time  
 409 passed after acquisition start in seconds.  
 410 Scale bar = 55  $\mu$ m; n = 3.



411

412

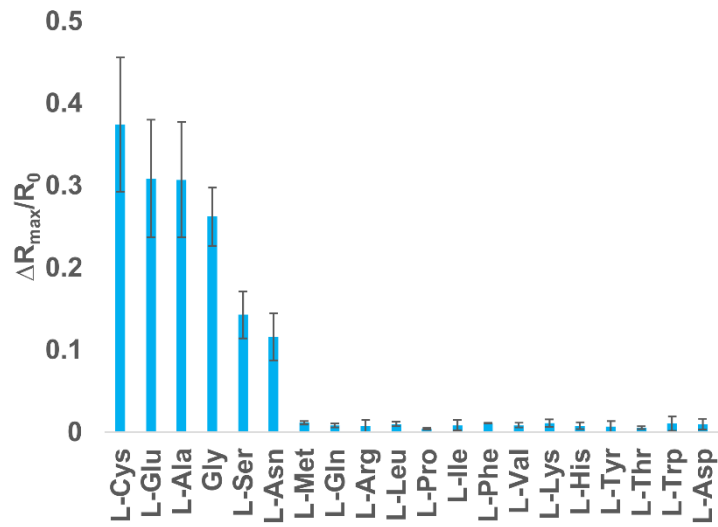

413

414

415 **Fig. S4.** Maximal relative amplitude of cpVenus/CFP ratio as  $\Delta R/R_0$  increase triggered by the 20  
416 amino acid L-enantiomers (1 mM) in the Col-0 wild-type seedling root tip expressing the NES-YC3.6  
417 calcium sensor.

418

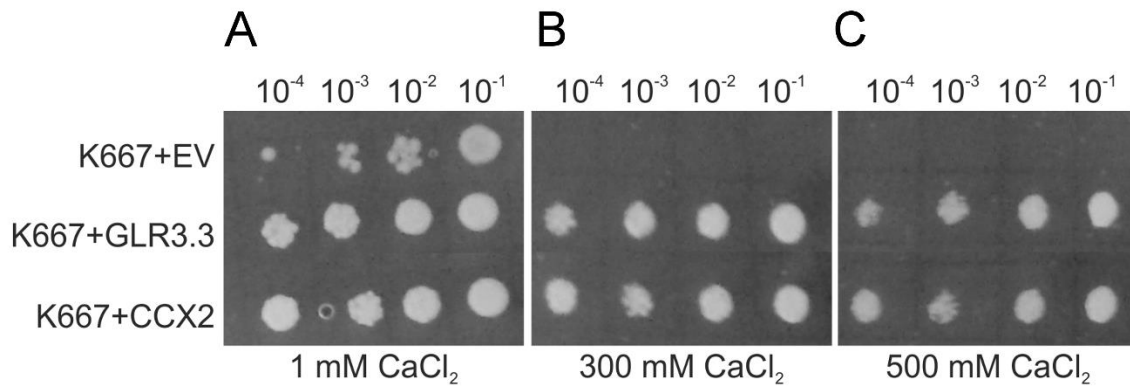

420

421

422 **Fig. S5.** Growth complementation assay of *S. cerevisiae* K667 transformed with pYES2-URA empty  
 423 vector (EV), pYES2-URA harboring GLR3.3 or the *Arabidopsis* cation/ $\text{Ca}^{2+}$  exchanger CCX2 as positive  
 424 control (14). Yeast cells were grown to  $\text{OD}_{600}$  of at least 1 and then 3  $\mu\text{l}$  of serial dilutions were  
 425 spotted onto SG-URA plates supplemented with 1 mM (A, control plate), 300 mM or 500 mM  $\text{CaCl}_2$   
 426 (B and C, selective plates). The experiment is representative of two independent biological replicates  
 427 showing similar results.

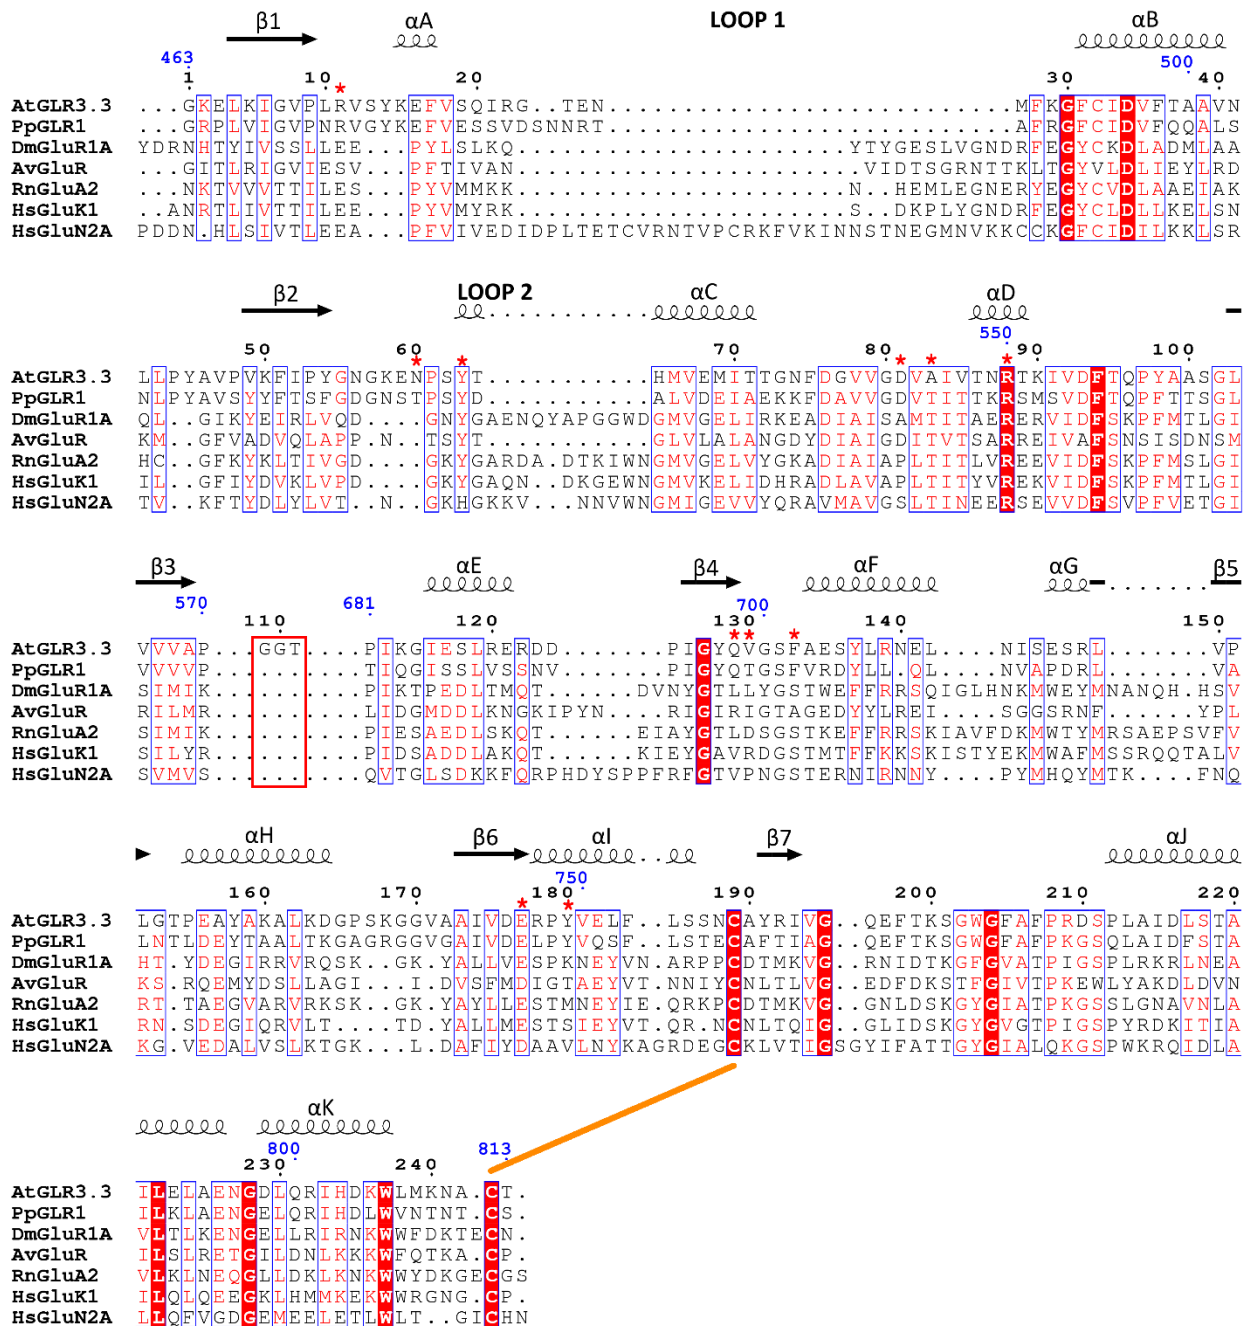

428

429 **Fig. S6.** Structure-based sequence alignment of LBDs (S1+S2 segments) from L-Glu-binding  
 430 iGluRs/GLRs of different species. AtGLR3.3: *Arabidopsis thaliana* GLR3.3 (this work); PpGLR1: moss  
 431 *Physcomitrella patens* GLR1; DmGluR1A: *Drosophila melanogaster* GluR1A (PDB ID 5dt6); AvGluR1:  
 432 rotifer *Adineta vaga* GluR1 (4io2); RnGluA2: *Rattus norvegicus* AMPA-subtype GluA2 (1ftj); HsGluK1:  
 433 *Homo sapiens* kainate-subtype GluK1 (2zns); HsGluN2A: *Homo sapiens* NMDA-subtype GluN2A  
 434 (5h8f\_A). At the top of the alignment, the AtGLR3.3 secondary structure (α-helices as coils, β-strands  
 435 as arrows), full-length numbering (blue) and numbering of the construct used in this paper (black)  
 436 are shown. Location of the intervening M1-M2-M3 sequence (replaced by the GGT linker in the  
 437 AtGLR3.3 construct of this work) is indicated by a red box. The two Cys residues forming the disulfide  
 438 bridge are connected by an orange line. Residues involved in ligand binding in the AtGLR3.3 LBD  
 439 structure are marked with red stars. See [SI Appendix, Materials and Methods](#) for the production of  
 440 this alignment.

441

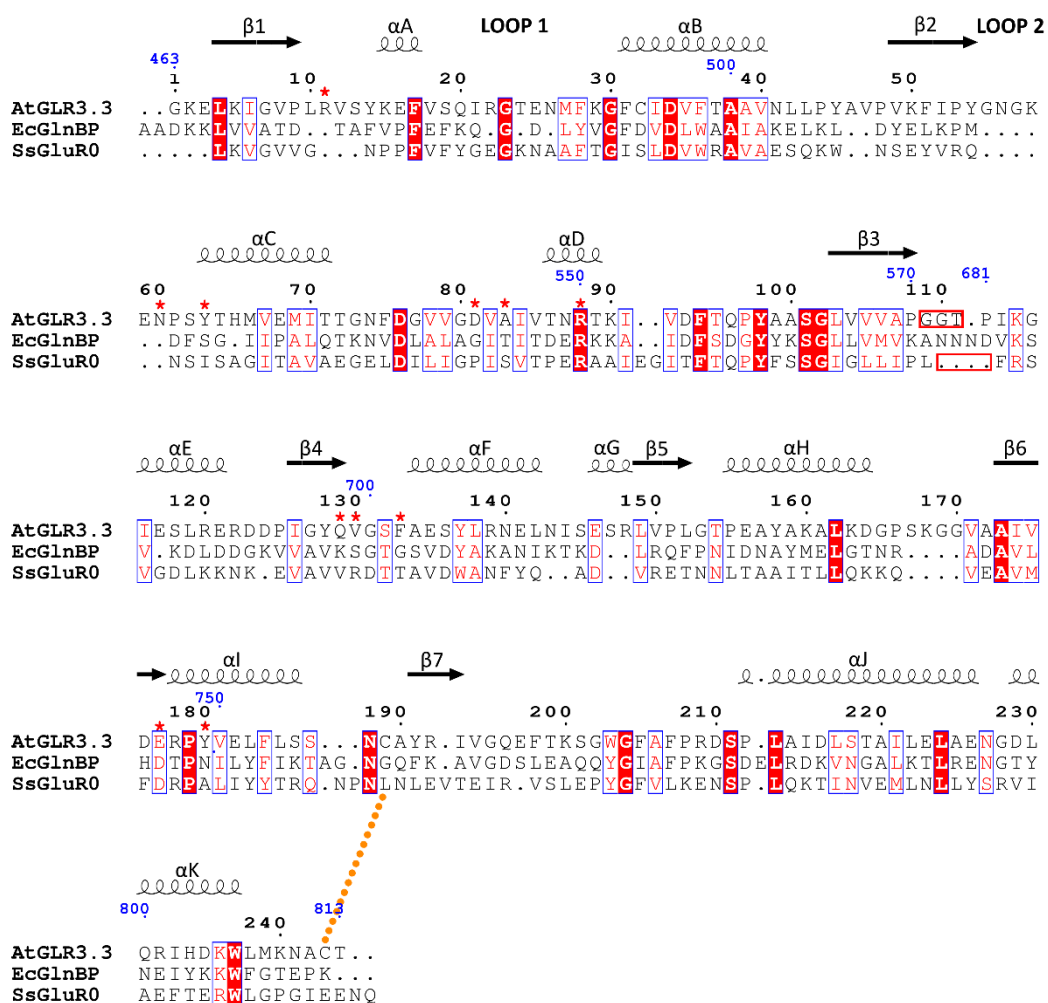

444

445 **Fig. S7.** Structure-based sequence alignment of LBDs (S1+S2 segments) of AtGLR3.3 with prokaryotic  
 446 homologous proteins. *EcGlnBP*: *Escherichia coli* glutamine-binding protein (PDB ID 1wdn); *SsGluR0*:  
 447 cyanobacterium *Synechocystis sp.* GluR0 (1ii5). At the top of the alignment, the AtGLR3.3 secondary  
 448 structure ( $\alpha$ -helices as coils,  $\beta$ -strands as arrows), full-length numbering (blue) and numbering of  
 449 the construct used in this paper (black) are shown. Location of the intervening M1-M2-M3 sequence  
 450 (replaced by the GGT linker in the AtGLR3.3 construct of this work) is indicated by red boxes. Note  
 451 that *SsGluR0* possesses transmembrane segments like AtGLR3.3, whereas *EcGlnBP* is a soluble  
 452 clamshell-shaped periplasmic protein. The position of the disulfide bond in AtGLR3.3 is indicated by  
 453 orange dots. Residues involved in ligand binding in the AtGLR3.3 LBD structure are marked with red  
 454 stars. See *SI Appendix, Materials and Methods* for the production of this alignment.

455

**A**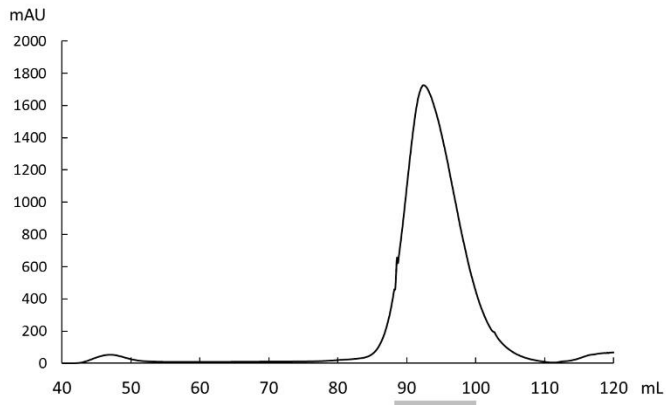**B**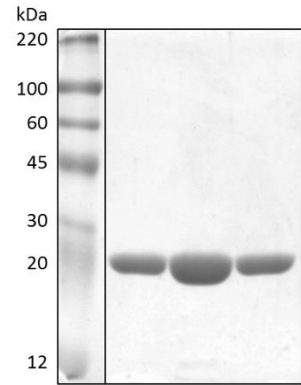**C****GLR3.3**

Date: 10/13/2017 11:14:43 AM  
 Solvent: PBS  
 Intensity: 674,314 counts/s  
 Z - Av. Diameter: 23.46nm  
 Polydispersity: 0.06 %

Temperature: 19.94°C  
 Solute: -  
 Intercept: 0.56  
 Std. Deviation: 0.01nm  
 Pd. Index: 0.000

Data Filter: Default  
 Laser: 100 %  
 Attenuator: 75 %  
 MW model: Globular Proteins  
 Remark: -

| Peak # | Mean Dh (nm) | Mode Dh (nm) | Std. Dev. (nm) | Polydisp. (%) | Est. MW. (kDa) | Intensity (%) | Mass (%) | Volume (%) | Number (%) |
|--------|--------------|--------------|----------------|---------------|----------------|---------------|----------|------------|------------|
| 1      | 4.09         | 4.87         | 1.78           | 43.52         | 25.28          | 39.52         | 99.89    | 99.97      | 100.00     |
| 2      | 77.45        | 87.67        | 31.89          | 41.18         | Out of Range   | 60.48         | 0.11     | 0.03       | 0.00       |

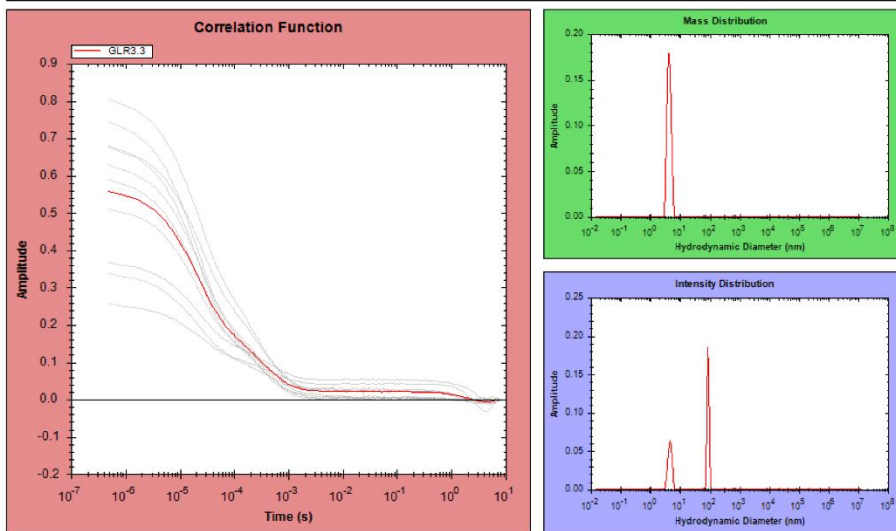**D**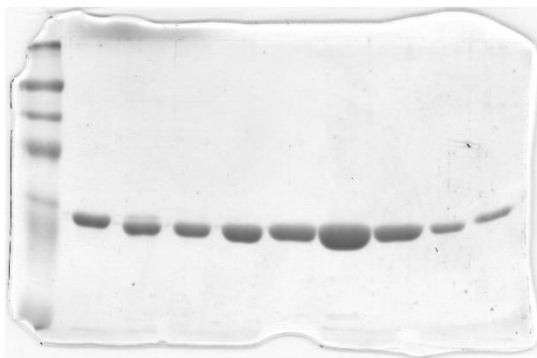



458 **(previous page)**

459 **Fig. S8.** Purification and characterization of GLR3.3 LBD. (A) Elution profile of GLR3.3 LBD from a  
460 preparative size-exclusion chromatography column (Superdex200 16/60, GE Healthcare)  
461 equilibrated with 10 mM HEPES pH 7.5, 150 mM NaCl, 0.5 mM EDTA, 0.5 mM L-Glu. The central  
462 fractions of the peak (marked) represent the final sample. (B) SDS polyacrylamide gel  
463 electrophoresis of three fractions (eluted from A) of purified GLR3.3 LBD (final sample), molecular  
464 weight  $\approx$  27kDa. Molecular weight marker: Blue Prestained Protein Standard, Broad Range (New  
465 England Biolabs). Gel: ExpressPlus PAGE (GenScript). (C) Report from a dynamic light scattering  
466 experiment on purified GLR3.3 LBD (1 mg/mL) loaded with L-Glu. The estimated molecular weight  
467 (25.28 kDa) is in agreement with the expected one for a monomeric sample (26.92 kDa). Instrument:  
468 Punk (Unchained Labs). (D) Original scan used to prepare the image in B.

469

470

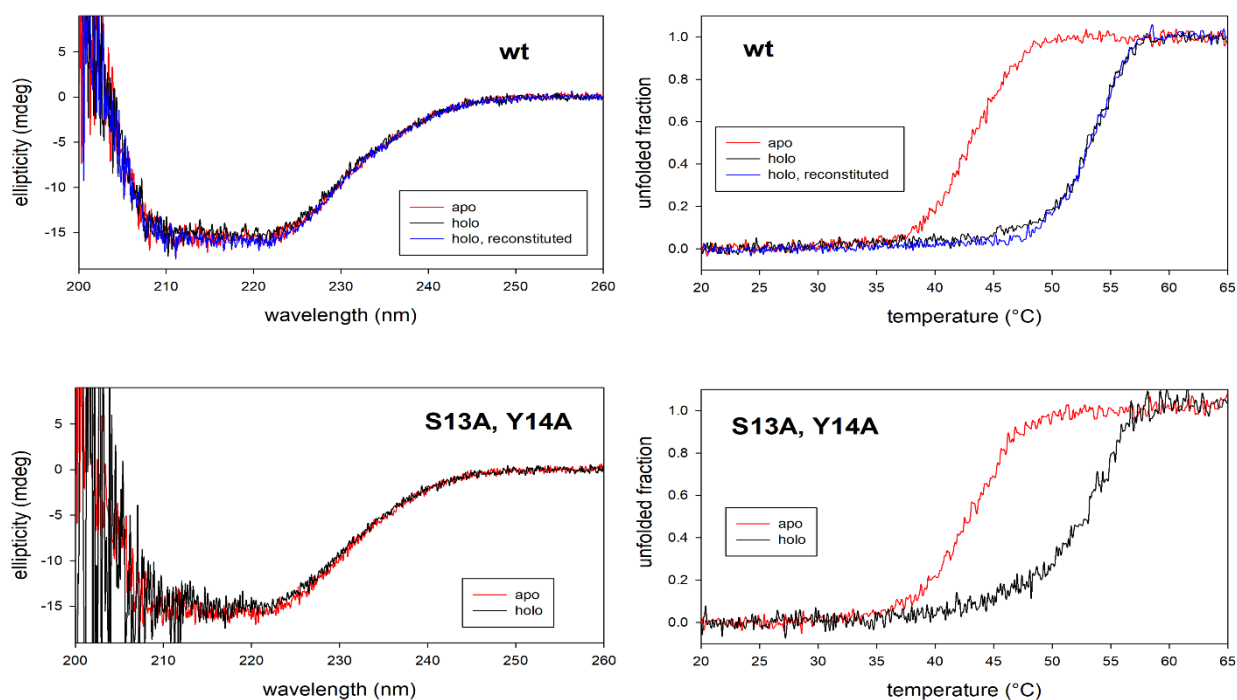

471

472

473 **Fig. S9.** Circular dichroism characterization of GLR3.3 LBD (wt, top, and mutant S13A-Y14A, bottom).  
 474 Left panels: far-UV CD spectra; right panels: temperature ramps (the change in ellipticity at 220 nm  
 475 was normalized as unfolded fraction). Black traces: holo (L-Glu-loaded); red traces: apo; blue traces:  
 476 reconstituted holo (the reconstituted holo was obtained by addition of L-Glu to the apo).  $T_m$  values  
 477 from the wt GLR3.3 LBD temperature ramps are 53.7 °C (holo), 42.9 °C (apo) and 53.8 °C  
 478 (reconstituted holo), whereas  $T_m$  values for GLR3.3 LBD S13A-Y14A are 53.7 °C (holo) and 43.2 °C  
 479 (apo).

480

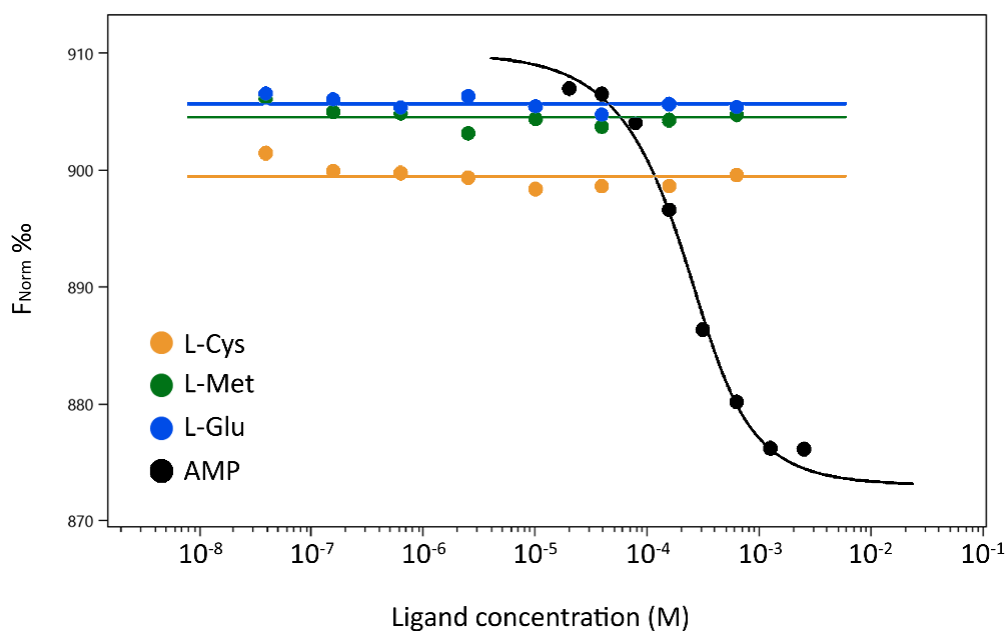

482

483

484

485 **Fig.S10.** Microscale thermophoresis control experiments. Cy5-labelled aptamer (reference  
 486 fluorescent target) does not show the binding of L-Cys, L-Met, L-Glu at any concentration tested  
 487 whereas the same reference efficiently binds AMP. The graph reports the concentration of the  
 488 ligand in the logarithmic scale vs the thermophoretic signal expressed as normalized fluorescence  
 489 (%). Fitting of the binding curve of AMP, based on the equation reported in [SI Appendix, Materials  
 490 and Methods](#), produces a dissociation constant ( $K_d$ ) of around 100  $\mu$ M, as reported by the  
 491 instrument data sheet provided by the manufacturer; horizontal lines interpolate the data for the  
 492 non-binding compounds.

493

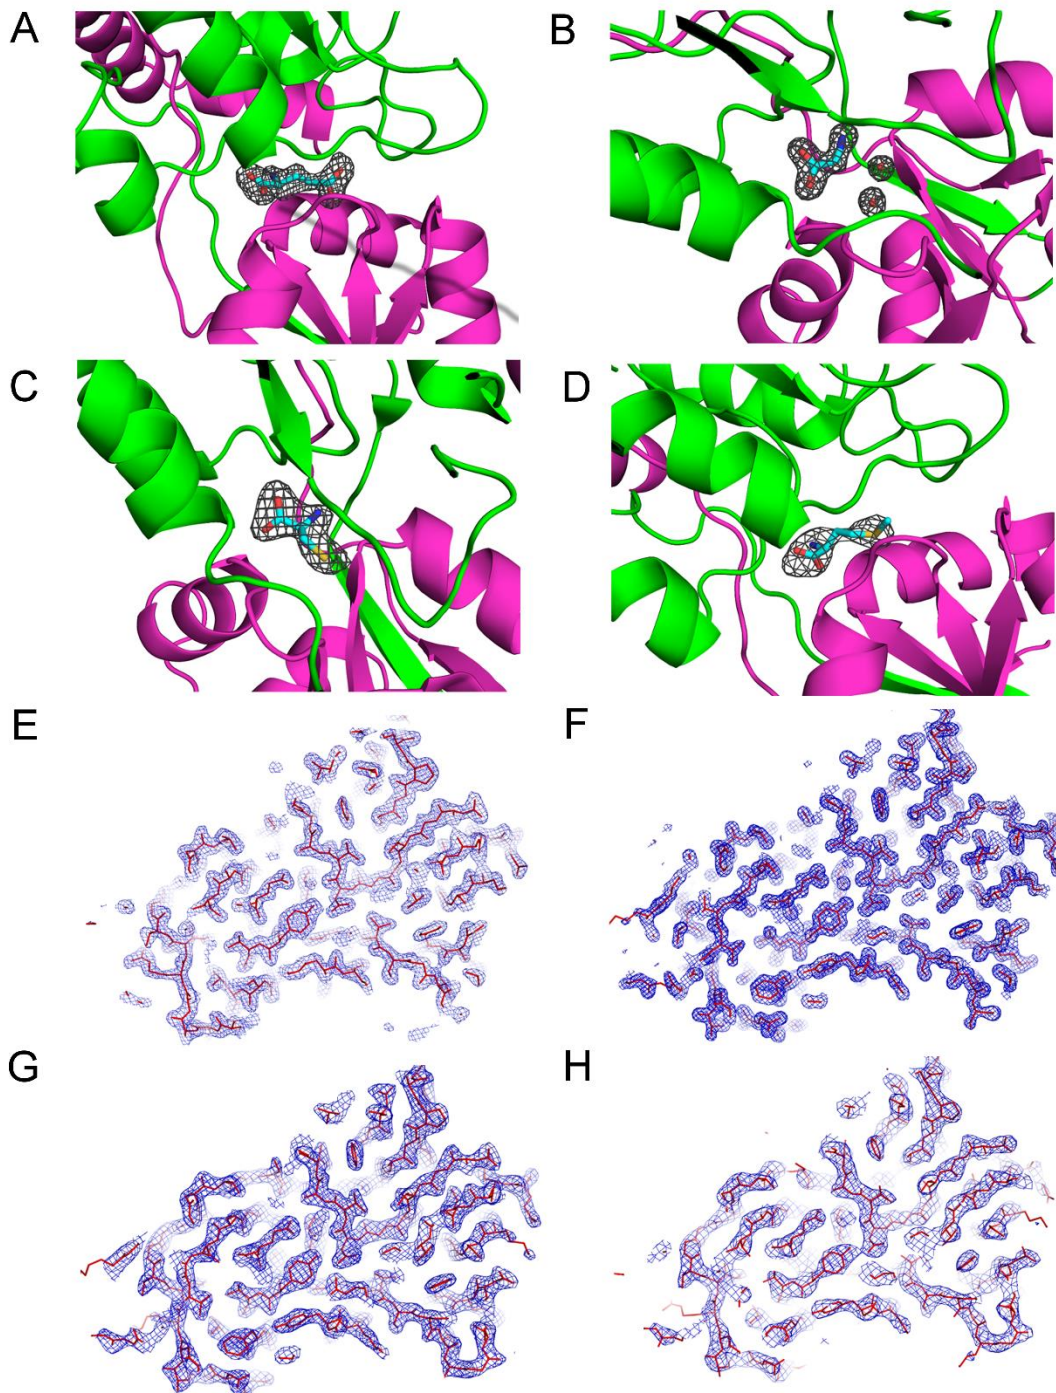

494

495

496 **Fig. S11.** Quality of the electron density maps. (A-D) The IFI<sub>0</sub>-IFI<sub>c</sub> electron density omit maps  
 497 contoured at 3.0 σ are shown for L-Glu (A), Gly and the two associated waters (B), L-Cys (C) and L-  
 498 Met (D). In the early rounds of refinement protein models lacking any ligand molecule produced  
 499 maps with clear IFI<sub>0</sub>-IFI<sub>c</sub> electron densities for the ligands in the binding sites. The ligand molecules  
 500 were then added in the following rounds of refinement. The color code is the same used in Fig. 2A-  
 501 E. See Fig. 2B-E for the 2IFI<sub>0</sub>-IFI<sub>c</sub> omit maps of the ligands. (E-H) Representative 2IFI<sub>0</sub>-IFI<sub>c</sub> electron  
 502 density maps contoured at 1.5 σ at the end of refinements for the L-Glu- (E), Gly- (F), L-Cys- (G) and  
 503 L-Met- (H) containing datasets.

504

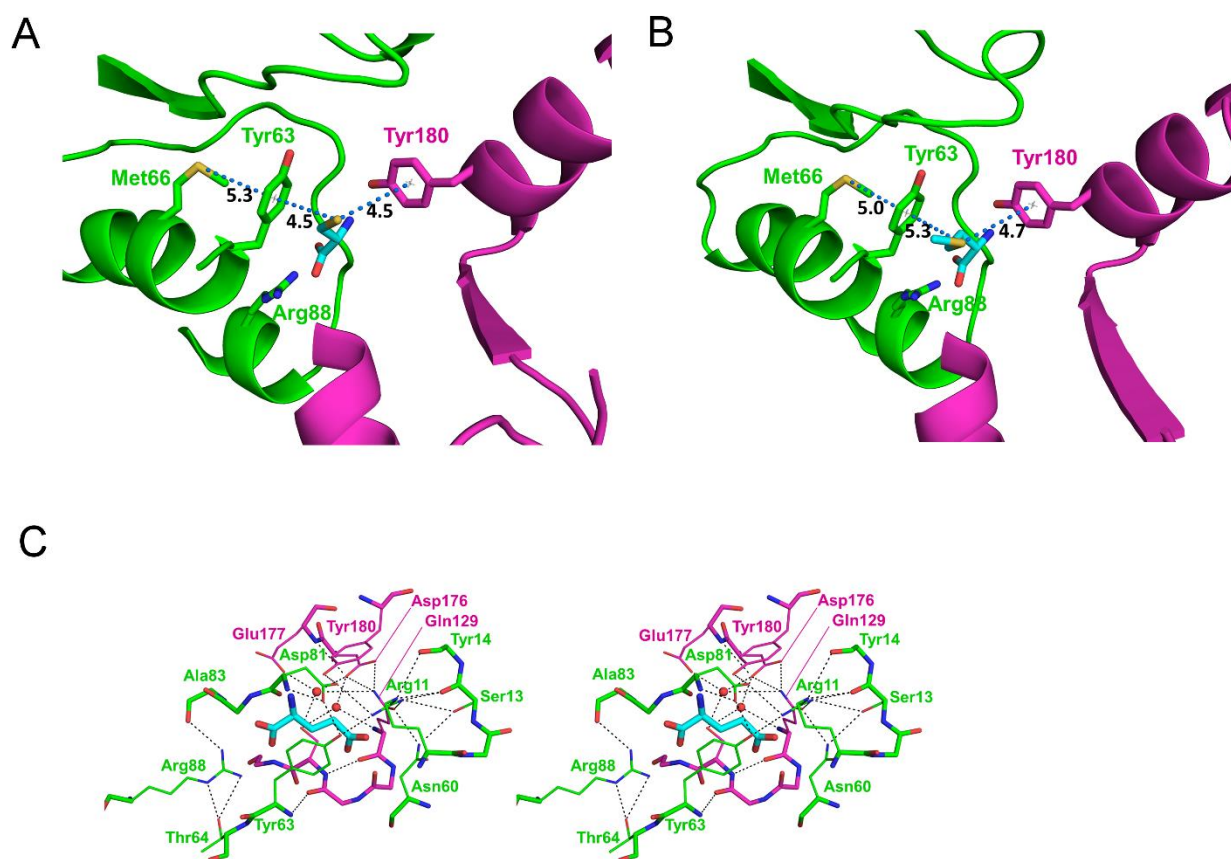

508 **Fig. S12.** Structural details of selected binding pockets in GLR3.3 LBD structures. (A-B) Close-up view  
 509 of the ligand binding pocket in the crystal structures of GLR3.3 LBD + L-Cys (A) and L-Met (B). The  
 510 ligands (cyan) and relevant side chains are in stick representation. Protein atoms from the S1  
 511 segment are green, from the S2 segment magenta. Oxygen is red, nitrogen blue, sulfur yellow. The  
 512 orientation highlights the series of sulfur/ $\pi$  interactions (blue dashes) generated by the presence of  
 513 the L-Cys and L-Met ligands. An almost straight line connects Met66 sulfur, the center of Tyr63 ring  
 514 and the ligand sulfur. Distances between sulfur atoms and centers of the aromatic rings are  
 515 indicated in Å. (C) View of the surroundings of the ligand-binding pocket of GLR3.3 LBD + L-Glu, with  
 516 the same color codes as in A-B, showing the intricate network of interactions immediately outside  
 517 the residues of Fig. 2B. Hydrogen or ionic bonds are shown as dashes; the ligand interactions shown  
 518 in Fig. 2B have been omitted for clarity.



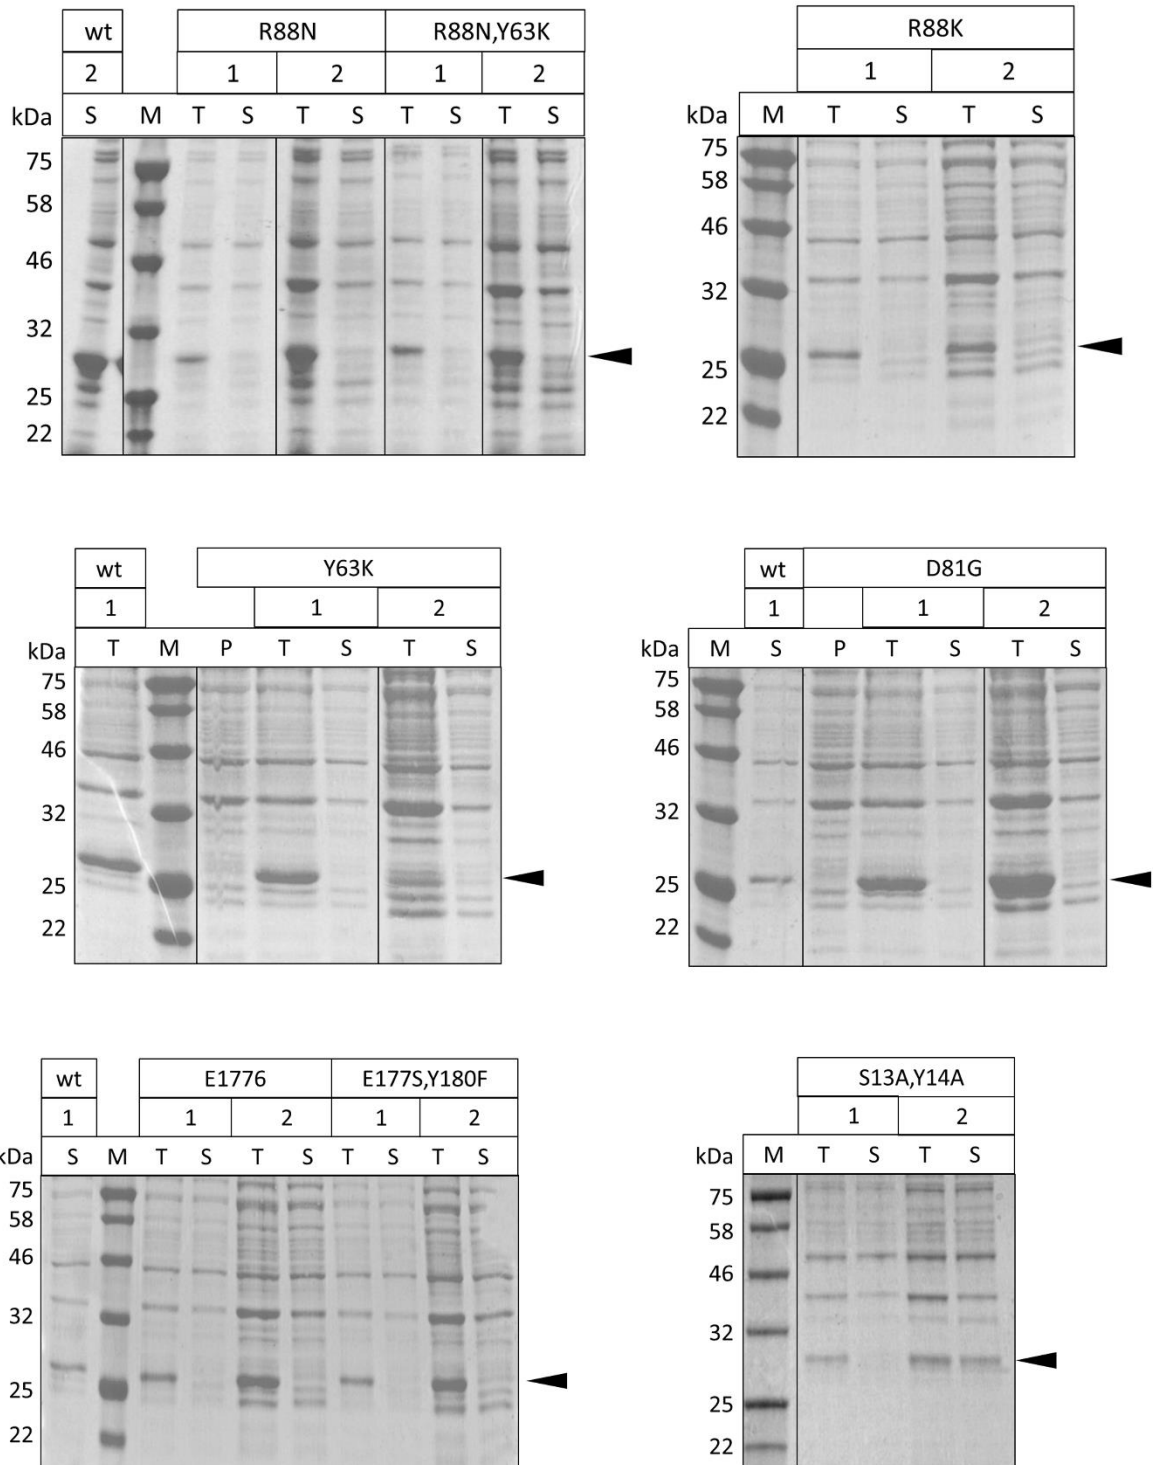

521

522

523 **Fig. S13.** SDS-polyacrylamide gel electrophoresis of fractions from small-scale expression tests of  
 524 the GLR3.3 LBD mutants in *E. coli*. 1/2: condition 1 (induction by 1 mM IPTG followed by shaking at  
 525 37 °C for 3 h) or 2 (induction by 0.1 mM IPTG followed by shaking at 20 °C for 16 h); T: total cell  
 526 lysate; S: soluble fraction; P: pre-induction sample; M: Blue Prestained Protein Standard, Broad  
 527 Range molecular weight marker (New England Biolabs). Wt samples are included for comparison;  
 528 His-tagged wt and mutant constructs have an approximate molecular weight of 29 kDa.

A

| PROTEIN           | $K_d$ ( $\mu\text{M}$ ) | $n$ |
|-------------------|-------------------------|-----|
| 3.3 LBD wt        | $2.2 \pm 0.5$           | 5   |
| 3.3 LBD S13A-Y14A | $2.1 \pm 0.4$           | 2   |

B

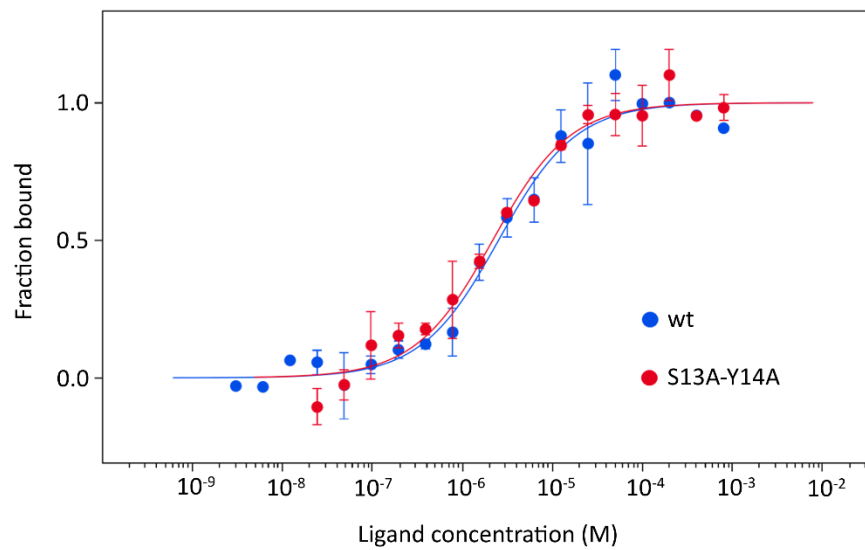

530

531

532 **Fig.S14.** Characterization of the binding properties of GLR3.3 LBD S13A-Y14A. (A) Values of the  
 533 dissociation constant ( $K_d$ )  $\pm$  SD for the binding of L-Glu to GLR3.3 LBD wt and S13A-Y14A, as  
 534 determined by microscale thermophoresis; the values reported are averages from  $n$  repeats. (B)  
 535 Fitting of the binding curves of L-Glu to GLR3.3 LBD wt and S13A-Y14A from the microscale  
 536 thermophoresis experiments, based on the equation reported in [SI Appendix, Materials and](#)  
 537 [Methods](#); the graph reports the concentration of the ligand in logarithmic scale vs the  
 538 thermophoretic signal normalized as fraction bound.

539

$\beta 1$   $\alpha A$  LOOP 1  $\alpha B$   $\beta 2$  LOOP 2  $\alpha C$

463 1 10 20 30 40 50 60

AtGLR33 GKE LKIGVPLRVSYSYKEFVVSQIRG...TENMFKGFCIDVFTAAVNL LPYAVPVKFIPIYGN...GKENP SY\* THMVEM  
 AtGLR31 GRR LRI GVPDRASF KDFVSRVNG...SSNKVQGGYCIDVFEAAVKL LSYPPVPHFIFGD...GLTNP NYNELVNK  
 AtGLR32 GRR LRI GVPDRASF KDFVSRVLDG...SNKVQGGYCIDVFEAAVKL LSYPPVPHFIFGD...GLKNP NFNELVNN  
 AtGLR34 GKP LRI GVPDRVSYSYTDYVSKDKN...PPGVKGGYCIDVFEAAIEL LPYVPVPTIYILYGD...GKRNP SYDNLVNE  
 AtGLR35 GKP LKIGVPPNRSYKNSYKSKDKN...PLGVKGGYCIDVFEAAIQ L LPYVPVPTIYILYGD...GKRNP SYDNLVNE  
 AtGLR36 GRH LRI GVPNRRYSFEEVVS...K...SNGMIGFCIDVFI AAINL LPYAVPFELVAFGN...GHDNP SNSELVRL  
 AtGLR37 ADP LKIGVPPRVSFVEFVTEKKN...SSHRIQGGYCIDVFI EALKFVVPYIPEFGN...GHSNP NYNHLLIQM  
 AtGLR21 GKR LQIGVPPNNTFQQFVKATRDP...INSTIFS GFSIDYFEAVIQAI PYD I SYDFIPFD...GGYDALVYQ  
 AtGLR22 GKK LRI GVPKRIGF TDLVKVTRDPI...INSTVVKGGYCIDVFEAVIQAMPYDVSYEFPEKPN GEPAGNHNDLVHQ  
 AtGLR23 GKK LRI GVPKRIGF TDLVKVTRDPI...INSTVVTGGYCIDVFEAVIRELPYDVSYEFPEKPD GKTAGNNDLVYQ  
 AtGLR24 GKE LQIGVPPVG...TFQQFVKVTTDPL...THEITVITGGYCIDVFEAVIQAMPYDVSHRIFIPGDDDKT...  
 AtGLR25 AKK LRI AVPKKDGFNFFVEVTKDN...TNVPTVTGGYCIDVFNVTMSQMPYAVSYEYIPEFDPD GKPRGSYDEMVYN  
 AtGLR26 AKK LRI AVPKKDGFNFFVEVTKDN...TNAPTITGGYCIDVFDTAMRQMPYAVPYEYIPEFDPD GKPRGSYDEMVYH  
 AtGLR27 GKM LRVGIPVKKGFLEFVDAKIDPI...SNAMTPTGGYCI EIFEAVLKKLPYSVIPKYIAFLSPD...EYDDEMVYQ  
 AtGLR28 GKK LRVGIPVKKGFLEFVDAKIDPI...TNITPKGGYCIDVFEAVLKKLPYSVIPQYRFEFSPD...DYDDL VYQ  
 AtGLR29 GKK LRVGIPVKKGFLEFVDAKIDPI...TNKNTPTGGYCI EIFEAVLKKLPYIPEYVFEFSPN...NYNDLVYQ  
 AtGLR11 KKV LRVLVITAGNKVPHLVSVPDPPE...TGVTSTGGYCEVFEKTCIFAFNYE...LEFIPYRGS...NNDNLVYL  
 AtGLR12 RKK LRVLVITSSNRFPRMLKVEETDPITHEITVEGFCIEVFEQASITAPFNYE...VEYIPLWLN...GT...NYTKL AYA  
 AtGLR13 RKK LRVLVITSSNRFPRMLKVEETDPVTNEL...IVEGFCIEVFEQASITAPFNYE...VEYIPLWLN...GS...NYDNLA YA  
 AtGLR14 KKK LRVLVITSSNRFPRMLKVEETDPVTNEL...ATGGYCIDVFEQASITAPFNYE...VEYIPLWLN...AINYKNDLVY T

$\alpha D$   $\beta 3$   $\alpha E$   $\beta 4$   $\alpha F$

70 80 90 100 110 120 130

AtGLR33 ITTGN...FDGVDVAIVTNRRTKIVDFIQPYAASGLV VVAP...GGT...PIKGI ESDRERRDDP IGYQVGSFAES  
 AtGLR31 VTTGV...FDGVDVAIVTNRRTKIVDFIQPYAESGLV VVAP...PIKGVDTLSSSTGRIGFVGSFAEN  
 AtGLR32 VTTGV...FDGVDVAIVTNRRTKIVDFIQPYAESGLV VVAP...PIRIGVDTLSSSTGRIGFVGSFAEN  
 AtGLR34 VVADN...FDGVDVAIVTNRRTKIVDFIQPYAESGLV VVAP...RIEGIDS LVTSNEP IGVQDGTFAFN  
 AtGLR35 VAANL...FDGVDVAIVTNRRTKIVDFIQPYAESGLV VVAP...RIEGMDTLASNEP IGVQDGTFAWK  
 AtGLR36 ITTGV...YDAGVGDITITERTKMDFFQPYAESGLV VVAP...PIKGIETLQTNHDP IGYQVGSFVRD  
 AtGLR37 VTDGV...YDAGVGDITITERTKMDFFQPYAESGLV VVAP...AITGIDS LRASEVP IGYQAGTFTLE  
 AtGLR21 VYLGK...YDAGVADTTISSNRSYVDFALPYTPSGVGLVVP...TNTINS LLAGESVGYQS...SFILG  
 AtGLR22 VYLGK...YDAGVADTTISSNRSYVDFALPYTPSGVGLVVP...TNTINS LLAGESVGYQS...SFILG  
 AtGLR23 VYLGK...YDAGVADTTISSNRSYVDFALPYTPSGVGLVVP...TNTINS LLAGESVGYQS...SFILG  
 AtGLR24 VYLGK...YDAGVADTTISSNRSYVDFALPYTPSGVGLVVP...TNTINS LLAGESVGYQS...SFILG  
 AtGLR25 VYLGK...YDAGVADTTISSNRSYVDFALPYTPSGVGLVVP...TNTINS LLAGESVGYQS...SFILG  
 AtGLR26 VYLGK...YDAGVADTTISSNRSYVDFALPYTPSGVGLVVP...TNTINS LLAGESVGYQS...SFILG  
 AtGLR27 VYLGK...YDAGVADTTISSNRSYVDFALPYTPSGVGLVVP...TNTINS LLAGESVGYQS...SFILG  
 AtGLR28 VYLGK...YDAGVADTTISSNRSYVDFALPYTPSGVGLVVP...TNTINS LLAGESVGYQS...SFILG  
 AtGLR29 VYDKT...WDAGVADTTISSNRSYVDFALPYTPSGVGLVVP...TNTINS LLAGESVGYQS...SFILG  
 AtGLR11 LSTQRDKYDAGVADTTISSNRSYVDFALPYTPSGVGLVVP...TNTINS LLAGESVGYQS...SFILG  
 AtGLR12 LHSQKDKYDAGVADTTISSNRSYVDFALPYTPSGVGLVVP...TNTINS LLAGESVGYQS...SFILG  
 AtGLR13 LHSQKDKYDAGVADTTISSNRSYVDFALPYTPSGVGLVVP...TNTINS LLAGESVGYQS...SFILG  
 AtGLR14 LYSQKDKYDAGVADTTISSNRSYVDFALPYTPSGVGLVVP...TNTINS LLAGESVGYQS...SFILG

$\alpha G$   $\beta 5$   $\alpha H$   $\beta 6$   $\alpha I$   $\beta 7$

140 150 160 170 180 190 200

AtGLR33 YRNELNISE SRLVPLGTPPEYAKALKDGPS...KGGVAAIVDERP YVEFLF...SNCA YRVRGQEFTKSGWGFAPR  
 AtGLR31 YMDLDELNIAS SRLVPLASPEEYANALQN...GTVA AIVDERP YIDFLFLS...DYCKFAIRGQEFTRCGWGFAPR  
 AtGLR32 YMDLDELNIAR SRLVPLGSPKRYAALQN...GTVA AIVDERP YIDFLFLS...EFCGFAIRGQEFTRCGWGFAPR  
 AtGLR34 YLINELNIP SRLVPLKDEEYLSALQRGN...AGGVA AIVDERP YIDFLFLS...NSNCKFRTRVQGEFTRCGWGFAPR  
 AtGLR35 YLIVLDELNIAP SRLVPLKDEEYLSALQRGN...AGGVA AIVDERP YIDFLFLS...NSNCKFRTRVQGEFTRCGWGFAPR  
 AtGLR36 YLIVLDELNIH SRLVPLRSPPEEYDKALRDGPS...KGGVAAVDERA YTELFLS...NRCEFGIVGQEFTRCKWGFAPR  
 AtGLR37 YLIVLDELNIH SRLVPLRSPPEEYDKALRDGPS...KGGVAAVDERA YTELFLS...NRCEFGIVGQEFTRCKWGFAPR  
 AtGLR21 RLR...DSGFSEASLVSYSYSPHECDALLKQQA...EGGVSAVLMVEVPYVRIFLGQYCNKYKMQVTFKVDLGFVFPPI  
 AtGLR22 KLN...ETGFPPQSSLVPPFDTAECDELLKKGPK...KGGVSAVLMVEVPYVRIFLGQYCNKYKMQVTFKVDLGFVFPPI  
 AtGLR23 KLN...ESGFPESSLVPPFTSPEKCEELLNKGP...KGGVSAVLMVEVPYVRIFLGQYCNKYKMQVTFKVDLGFVFPPI  
 AtGLR24 RLL...QMRFDESSRLKTYNSPEEMRELFLLKSS...NGGDAAFDEVA YIKLFLMAYKCYSEYIIEPTFKADGFVFPPI  
 AtGLR25 RLL...QMRFDESSRLKTYNSPEEMRELFLLKSS...NGGDAAFDEVA YIKLFLMAYKCYSEYIIEPTFKADGFVFPPI  
 AtGLR26 RLL...QMRFDESSRLKTYNSPEEMRELFLLKSS...NGGDAAFDEVA YIKLFLMAYKCYSEYIIEPTFKADGFVFPPI  
 AtGLR27 LLL...SQGFDESSQLKPFSSAVCEDELFSNG...T...ITASFDEVA YIKVILSONSSKYTMVEPSPKTAGGFVFPPI  
 AtGLR28 FLL...KEGFNVSKLKPFGSSSEECALLLSNG...S...ISA AFDVA YLRAILSQYCSKYAIVEPTFKTAGGFVFPPI  
 AtGLR29 ILL...GLGFHEDQLKPFDSAKDADDLLSKG...K...SKGTA AAFDEVA YLRAILSQYCSKYAIVEPTFKTAGGFVFPPI  
 AtGLR11 ...SMTARLGSINAVAYAAQLLRD...T...LNHVINTEP YLSTILGNYPNDVMTDRVTNTNGFVFPPI  
 AtGLR12 AALTNSSLRAMRLGLNLSADYAAQLLNK...S...SVSYINSELP YLKLILGENPGLFLMVKIQSTNTNGFVFPPI  
 AtGLR13 VALTSSSLRAMRSLGLNLSADYAAQLLNK...T...TVSFVDELP YLKVVLGENPGLFLMVKIQSTNTNGFVFPPI  
 AtGLR14 VNDNPTFQGRYKGLKTA DDFTNALRNG...T...TISEIVDEVP YVYKLVVAKHPSEVIVVETESVNTNGFVFPPI

$\alpha J$   $\alpha K$

210 220 230 240

AtGLR33 DSP LAIDLS TAIDE LAENGDIQR IHDKWL MKN...ACT  
 AtGLR31 DSP LAVDMSTAILGLSETGELQK IHDRWLSKS...NCS  
 AtGLR32 DSP LAIDMS TAIDLGLSETGELQK IHDKWL SRS...NCS  
 AtGLR34 DSP LAVDMSTAILQLSEEGELEK IHRKWL NYK...HECS  
 AtGLR35 DSP LAVDMSTAILQLAEEGLEK IRRKWL TYD...HECT  
 AtGLR36 DSP LAVDVSAAIQLSENGDMQR IRRKWL LRK...ACS  
 AtGLR37 DSP LAIDMS TAIDLKSETRKLQE IRRKWL CKT...NCA  
 AtGLR21 GSP LVADISRAILKVAESPKAVE LERAWFKKKEQSCP  
 AtGLR22 GSP LVADVSRAILKVAESPKAVE LERAWFKKKEQSCP  
 AtGLR23 GSP LVADVSRAILKVAESPKAVE LERAWFKKKEQSCP  
 AtGLR24 GSP LVADVSRAILKVAESPKATQLETA WFKNKIDKTCP  
 AtGLR25 GSP LVSDISRAILNITEGDAKAIENKWL LGE...KHCL  
 AtGLR26 GSP LVFDLSRQILNITEGETMKA IENKWL LGE...KHCL  
 AtGLR27 KSP LITDVSRAILNVTQGEEMQH IENKWL FKKP...NNCP  
 AtGLR28 NSP LITGDSKAILNVTQGEEMQH IENKWL FKKP...NNCP  
 AtGLR29 NSP LITGDSKAILNVTQGEEMQH IENKWL FKKP...NNCP  
 AtGLR11 GSD LVPKVSREIAKLRSLGMLKDMKWKWFKQLDLSLVY  
 AtGLR12 GSE LAFNVSREIAKLRSLGMLKDMKWKWFKQLDLSLVY  
 AtGLR13 GFE LVPNVSREIAKLRSLGMLKDMKWKWFKQLDLSLVY  
 AtGLR14 GSP LVPKVSREIAKLRSLGMLKDMKWKWFKQLDLSLVY

542 (previous page)

543 **Fig. S15.** Sequence alignment of the LBDs (S1+S2 segments) of all *A. thaliana* GLR isoforms, with the  
544 GLR3.3 LBD sequence (this work) at the top and the other sequences grouped by clade. Above the  
545 alignment, the GLR3.3 secondary structure ( $\alpha$ -helices as coils,  $\beta$ -strands as arrows), full-length  
546 numbering (blue) and numbering of the construct used in this paper (black) are shown. Location of  
547 the intervening M1-M2-M3 sequence (replaced by the GGT linker in the GLR3.3 construct of this  
548 work) is indicated by a red box. The position of the disulfide bond in GLR3.3 is indicated by orange  
549 dots. Residues involved in ligand binding in the GLR3.3 LBD structure are marked with red stars. See  
550 [SI Appendix, Materials and Methods](#) for the production of this alignment.

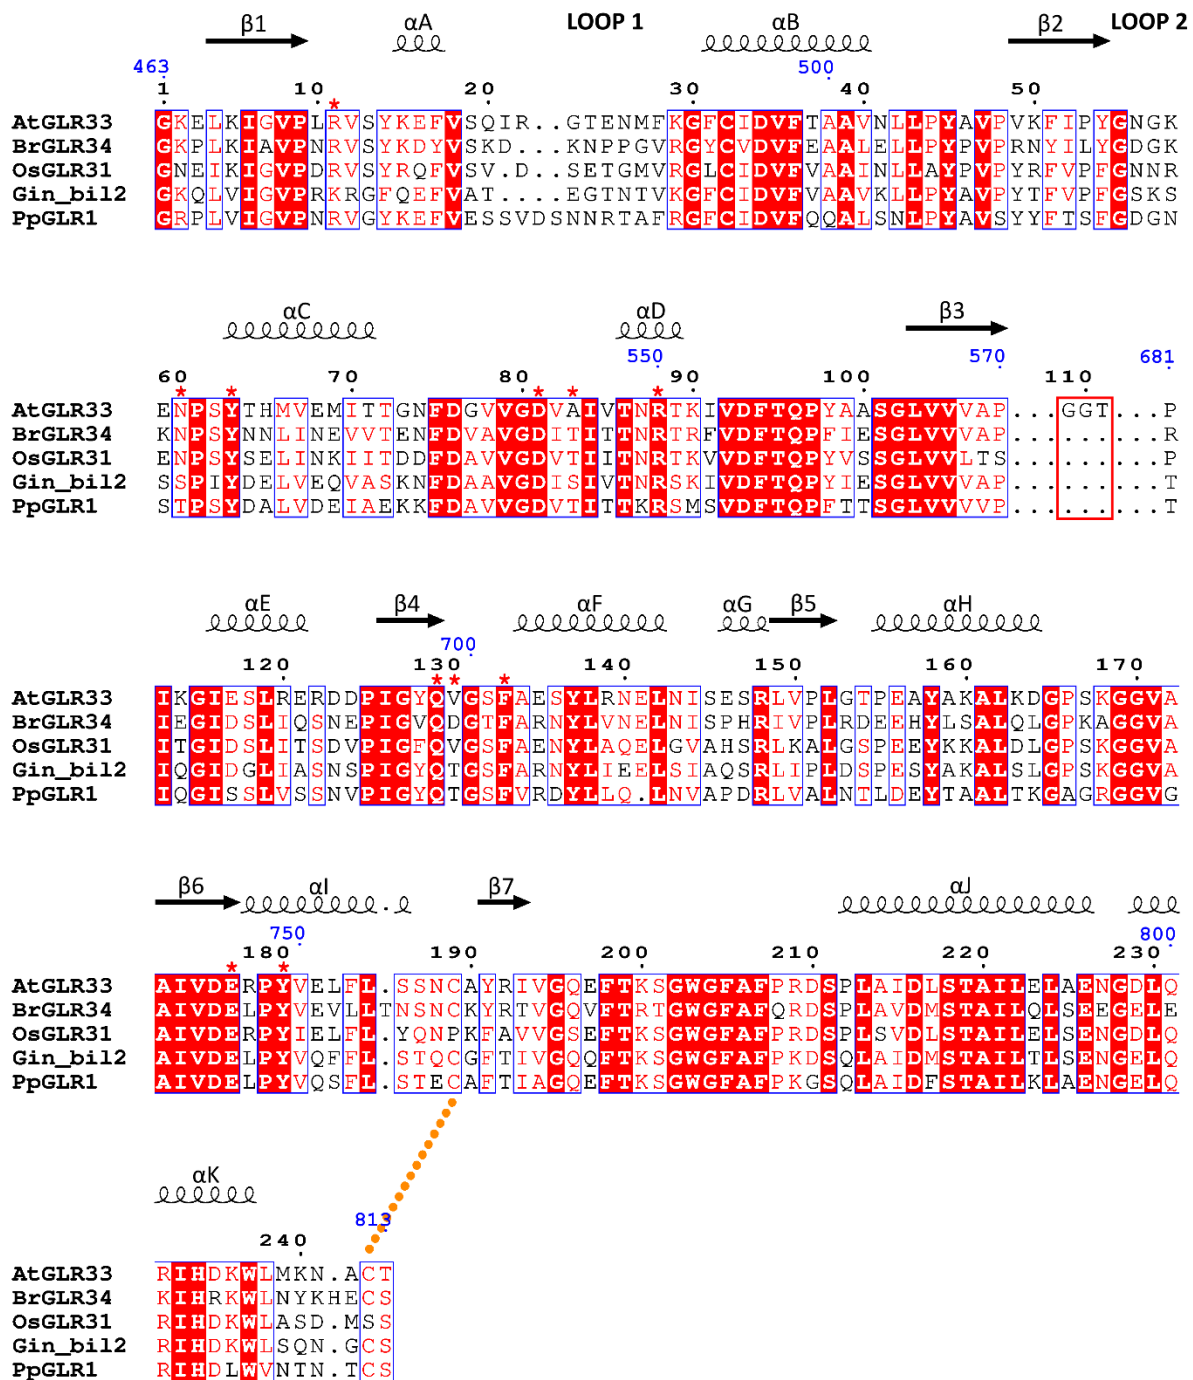

554 **Fig. S16.** Sequence alignment of LBDs (S1+S2 segments) of clade 3 GLRs from different plant species.  
 555 *AtGLR3.3*: *Arabidopsis thaliana* GLR3.3 (this work); *BrGLR3.4*: *Brassica rapa* GLR3.4; *OsGLR3.1*: *Oryza*  
 556 *sativa* GLR3.1; *Gin\_bil2*: *Ginkgo biloba* putative GLR2; *PpGLR1*: moss *Physcomitrella patens* GLR1. At  
 557 the top of the alignment, the *AtGLR3.3* secondary structure ( $\alpha$ -helices as coils,  $\beta$ -strands as arrows),  
 558 full-length numbering (blue) and numbering of the construct used in this paper (black) are shown.  
 559 Location of the intervening M1-M2-M3 sequence (replaced by the GGT linker in the *AtGLR3.3*  
 560 construct of this work) is indicated by a red box. The position of the disulphide bond in *AtGLR3.3*  
 561 is indicated by orange dots. Residues involved in ligand binding in the *AtGLR3.3* LBD structure are  
 562 marked with red stars. See [SI Appendix, Materials and Methods](#) for the production of this alignment.



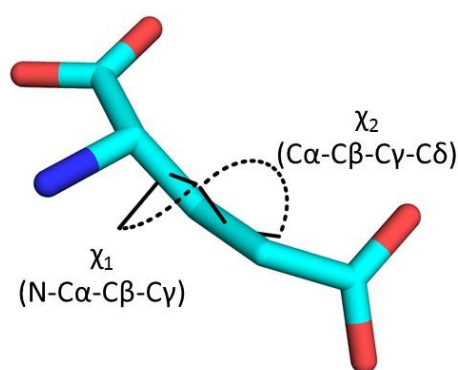

563

| GLR/iGluR LBD                                  | PDB ID | chain | $\chi_1$ (°) | $\chi_2$ (°) |
|------------------------------------------------|--------|-------|--------------|--------------|
| <i>Arabidopsis thaliana</i> GLR3.3 (this work) | 6r85   | A     | -81          | -149         |
|                                                | 6r85   | B     | -75          | -151         |
| <b>Eukaryotes (non-plant)</b>                  |        |       |              |              |
| <i>Rattus norvegicus</i> GluA2 (AMPA-type)     | 1ftj   | A     | -78          | -72          |
|                                                | 1ftj   | B     | -76          | -74          |
|                                                | 1ftj   | C     | -73          | -73          |
|                                                | 3rn8   | A     | -74          | -75          |
|                                                | 3rn8   | B     | -76          | -71          |
|                                                | 3rn8   | C     | -75          | -73          |
| <i>Rattus norvegicus</i> GluA3 (AMPA-type)     | 3dln   | A     | -75          | -75          |
| <i>Rattus norvegicus</i> GluA4 (AMPA-type)     | 3epe   | A     | -75          | -77          |
|                                                | 3epe   | B     | -76          | -71          |
| <i>Homo sapiens</i> GluK1 (kainate-type)       | 2zns   | A     | -83          | -67          |
| <i>Rattus norvegicus</i> GluK2 (kainate-type)  | 1s50   | A     | -79          | -67          |
| <i>Homo sapiens</i> GluN2A (NMDA-type)         | 5h8f   | A     | -83          | -60          |
| <i>Adineta vaga</i> AvGluR1                    | 4io2   | A     | -57          | -70          |
|                                                | 4io2   | B     | -59          | -71          |
| <i>Drosophila melanogaster</i> GluRIIB         | 4wxj   | A     | -73          | -81          |
|                                                | 4wxj   | B     | -70          | -80          |
| <i>Drosophila melanogaster</i> GluR1A          | 5dt6   | A     | -81          | -70          |
| <b>Prokaryotes</b>                             |        |       |              |              |
| <i>Synechocystis sp.</i> GluR0                 | 1ii5   | A     | -57          | -179         |
| <i>Thermus thermophilus</i> GluR0              | 1us5   | A     | -61          | -177         |
| <i>Nostoc punctiforme</i> GluR0                | 2pyy   | A     | -174         | -175         |
|                                                | 2pyy   | B     | -175         | -174         |
|                                                | 2pyy   | C     | -176         | -178         |

564

565 **Fig. S17.** Table reporting the values (°) of the  $\chi_1$  and  $\chi_2$  dihedral angles of the L-Glu ligand side chain  
 566 for a number of deposited structures of glutamate-bound GLR/iGluR ligand-binding domains.

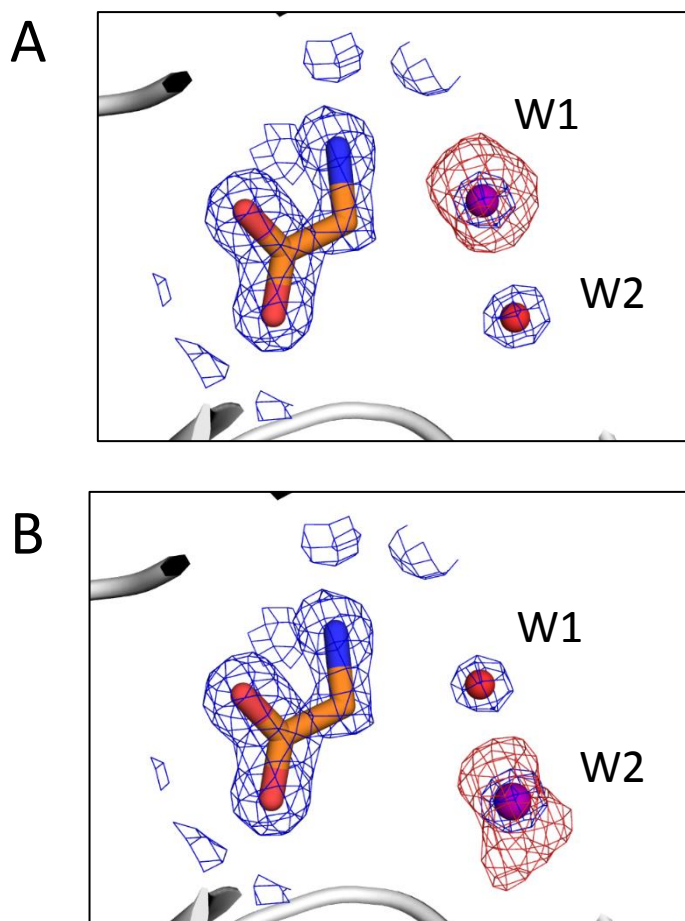

568

569 **Fig. S18.** Alternative refinement of GLR3.3 + Gly dataset. A  $\text{Cl}^-$  ion was placed in the position of either  
 570 of the two additional water molecules in the Gly dataset ligand pocket and 5 cycles of restrained  
 571 refinement were performed by the software *REFMAC5* (42); a clear peak of negative density in the  
 572  $|F|_o - |F|_c$  electron density map (red mesh in the figure, showed at  $3.0 \sigma$  contour level) appeared and  
 573 the corresponding B-factors increased from 20.2 to 36.6 (W1 position) and from 21.9 to 37.3 (W2  
 574 position), ruling out the possibility that the spherical densities may correspond to ions rather than  
 575 water molecules. Extending this operation to the four water molecules of the pocket in all chains of  
 576 the Gly dataset invariably causes increases of B-factors from a range of around 15-20 to a range of  
 577 37-60. The blue mesh corresponds to the  $2|F|_o - |F|_c$  electron density map at  $1.5 \sigma$  contour level.

578

579

580  
581

**Table S1.** Crystallographic statistics. Values in parentheses are for the highest-resolution shell.

|                                                          | SeMet<br>+L-Glu                  | native<br>+L-Glu | native<br>+Gly                                | native<br>+L-Cys                              | native<br>+L-Met                              |
|----------------------------------------------------------|----------------------------------|------------------|-----------------------------------------------|-----------------------------------------------|-----------------------------------------------|
| <b>Data collection</b>                                   |                                  |                  |                                               |                                               |                                               |
| Space group                                              | P4 <sub>3</sub> 2 <sub>1</sub> 2 | P1*              | P2 <sub>1</sub> 2 <sub>1</sub> 2 <sub>1</sub> | P2 <sub>1</sub> 2 <sub>1</sub> 2 <sub>1</sub> | P2 <sub>1</sub> 2 <sub>1</sub> 2 <sub>1</sub> |
| Cell parameters<br>( <i>a</i> , <i>b</i> , <i>c</i> , Å) | 98.4, 98.4,<br>113.9             | 35.9, 61.3, 64.1 | 97.0, 98.2, 114.3                             | 97.7, 98.5, 114.1                             | 95.5, 96.8, 114.8                             |
| Cell parameters ( $\alpha$ , $\beta$ , $\gamma$ ,<br>°)  | 90.0                             | 75.2, 75.5, 90.0 | 90.0                                          | 90.0                                          | 90.0                                          |
| Resolution (Å)                                           | 50.0-2.4                         | 60.0-2.0         | 50.0-1.6                                      | 50.0-2.5                                      | 50.0-3.2                                      |
| No. of monomers<br>/ asymm. unit                         | 2                                | 2                | 4                                             | 4                                             | 4                                             |
| Observations                                             | 974572                           | 105514           | 940331                                        | 260518                                        | 76068                                         |
| Unique reflections                                       | 22542                            | 33332            | 144028                                        | 38874                                         | 17844                                         |
| R <sub>merge</sub> <sup>a</sup>                          | 0.28 (4.4)                       | 0.10 (0.44)      | 0.07 (0.74)                                   | 0.25 (1.43)                                   | 0.42 (2.32)                                   |
| Mean <i>I</i> / $\sigma$ ( <i>I</i> )                    | 16.0 (1.2)                       | 4.9 (1.6)        | 12.9 (1.7)                                    | 6.0 (1.1)                                     | 4.5 (1.4)                                     |
| Completeness (%)                                         | 100.0 (99.8)                     | 96.7 (94.7)      | 100.0 (100.0)                                 | 100.0 (100.0)                                 | 98.7 (99.6)                                   |
| Multiplicity                                             | 43.2 (43.9)                      | 3.2 (3.2)        | 6.5 (4.9)                                     | 6.7 (6.9)                                     | 4.3 (4.6)                                     |

**Phasing**

|                                                |                     |   |   |   |   |
|------------------------------------------------|---------------------|---|---|---|---|
| Anomalous completeness (%)                     | 100.0 (99.9)        | - | - | - | - |
| Anomalous multiplicity                         | 23.0 (22.8)         | - | - | - | - |
| Overall FOM<br>(centric/acentric) <sup>b</sup> | 0.21<br>(0.09/0.23) | - | - | - | - |

**Refinement**

|                                                 |                                       |                                       |                                        |                                       |
|-------------------------------------------------|---------------------------------------|---------------------------------------|----------------------------------------|---------------------------------------|
| R-factor/R <sub>free</sub> <sup>c</sup>         | 0.207/0.262                           | 0.151/0.181                           | 0.188/0.228                            | 0.242/0.307                           |
| No. of protein residues<br>/ monomer            | 238;239                               | 242;238;238;243                       | 238;239;239;238                        | 239;209;237;237**                     |
| Average B-factor (Å <sup>2</sup> ) <sup>d</sup> | 24.1                                  | 21.2                                  | 38.1                                   | 39.7                                  |
| No. of ligand molecules                         | 2                                     | 4                                     | 4                                      | 4                                     |
| Average B-factor (Å <sup>2</sup> ) <sup>d</sup> | 17.2                                  | 16.5                                  | 37.7                                   | 32.1                                  |
| No. of ions                                     | 4                                     | 8                                     | 3                                      | 2                                     |
| Average B-factor (Å <sup>2</sup> ) <sup>d</sup> | 34.4                                  | 46.2                                  | 46.9                                   | 17.5                                  |
| No. of water molecules                          | 315                                   | 1048                                  | 387                                    | 1                                     |
| Average B-factor (Å <sup>2</sup> ) <sup>d</sup> | 31.1                                  | 35.7                                  | 32.3                                   | 7.0                                   |
| rmsd bond lengths (Å) <sup>e</sup>              | 0.007                                 | 0.013                                 | 0.007                                  | 0.006                                 |
| rmsd bond angles (°) <sup>e</sup>               | 1.48                                  | 1.81                                  | 1.47                                   | 1.38                                  |
| <b>Ramachandran plot</b>                        |                                       |                                       |                                        |                                       |
| in preferred regions (%)                        | 97.4                                  | 97.6                                  | 97.5                                   | 98.0                                  |
| in allowed regions (%)                          | 2.6                                   | 2.4                                   | 2.5                                    | 2.0                                   |
| outliers (%)                                    | 0.0                                   | 0.0                                   | 0.0                                    | 0.0                                   |
| MolProbity Score <sup>f</sup>                   | 1.96<br>(76 <sup>th</sup> percentile) | 1.27<br>(97 <sup>th</sup> percentile) | 1.26<br>(100 <sup>th</sup> percentile) | 1.97<br>(99 <sup>th</sup> percentile) |

|        |      |      |      |      |
|--------|------|------|------|------|
| PDB ID | 6R85 | 6R88 | 6R89 | 6R8A |
|--------|------|------|------|------|

582  
583  
584  
585  
586

\* Data from native crystals +L-Glu solved in space group C2 (*a*=124.2, *b*=35.9, *c*=61.3;  $\alpha$ =90.0,  $\beta$ =105.4,  $\gamma$ =90.0) showed slightly worse statistics; all statistics reported here for native crystals +L-Glu refer to data solved in space group P1.

587 \*\* In the chain B of the L-Met dataset, a total of 29 internal residues were not included in the final  
588 PDB due to missing or very poor electron density.

589 <sup>a</sup>  $R\text{-merge} = \frac{\sum_{hkl} \sum_j |I_{hkl,j} - \langle I_{hkl} \rangle|}{\sum_{hkl} \sum_j I_{hkl,j}}$ .

590 The high  $R_{\text{merge}}$  value observed for the selenomethionine dataset and the L-Cys and L-Met datasets  
591 was due to the considerable redundancy of the dataset and/or a partial decay of the crystal during  
592 data collection. Maps calculated including all data were of higher quality than those calculated by  
593 including a largely redundant but more restricted subset of reflections with lower resolution and  
594 lower  $R_{\text{merge}}$ .

595 <sup>b</sup> Overall figure of merit (and for centric and acentric reflections) calculated by the program *Phaser*  
596 (53).

597 <sup>c</sup>  $R\text{-factor} = \frac{\sum_{hkl} |F_{\text{obs}_{hkl}} - F_{\text{calc}_{hkl}}|}{\sum_{hkl} |F_{\text{obs}_{hkl}}|}$  where  $F_{\text{obs}}$  and  $F_{\text{calc}}$  are the observed and  
598 calculated structure factor amplitudes, respectively.  $R_{\text{free}}$  is the R-factor value for 5% of the  
599 reflections excluded from the refinement.

600 <sup>d</sup> Average B-factors calculated with the program Baverage from the *CCP4* suite (27).

601 <sup>e</sup> Root mean square deviations from ideal values calculated with *REFMAC5* (42).

602 <sup>f</sup> combines the clashscore, rotamer and Ramachandran evaluations giving one number that reflects  
603 the crystallographic resolution at which those values would be expected; from the server *MolProbity*  
604 (<http://molprobity.biochem.duke.edu/>) (45).

605  
 606  
 607  
 608  
 609  
 610

**Table S2.** Table listing the GLR3.3 LBD mutants generated and tested by small-scale expression in *E. coli*. The corresponding results are reported. Condition 1: induction by 1 mM IPTG followed by shaking at 37 °C for 3 h. Condition 2: induction by 0.1 mM IPTG followed by shaking at 20 °C for 16 h.

| MUTANT      | DESCRIPTION                    | CONDITION | EXPRESSION            | SOLUBILITY | SCALE-UP |
|-------------|--------------------------------|-----------|-----------------------|------------|----------|
| R88N        | ligand-contacting residue      | 1         | very good             | very poor  | no       |
|             |                                | 2         | very good             | very poor  | no       |
| R88N,Y63K   | ligand-contacting residues     | 1         | very good             | very poor  | no       |
|             |                                | 2         | very good             | very poor  | no       |
| R88K        | ligand-contacting residue      | 1         | very good             | none       | no       |
|             |                                | 2         | very good             | very poor  | no       |
| Y63K        | ligand-contacting residue      | 1         | very good             | none       | no       |
|             |                                | 2         | good with degradation | very poor  | no       |
| D81G        | residue from the outer network | 1         | very good             | none       | no       |
|             |                                | 2         | very good             | none       | no       |
| E177S       | ligand-contacting residue      | 1         | very good             | none       | no       |
|             |                                | 2         | very good             | none       | no       |
| E177S,Y180F | ligand-contacting residues     | 1         | very good             | none       | no       |
|             |                                | 2         | very good             | very poor  | no       |
| S13A,Y14A   | residues at domain interface   | 1         | good                  | none       | no       |
|             |                                | 2         | good                  | good       | yes      |

611



612  
613  
614  
615  
616  
617

**Table S3.** Homology modelling statistics.

All models were generated using the online server SWISS-MODEL (swissmodel.expasy.org) (47). In all cases the areas affected by the lowest local reliability correspond to the exposed loop 1 (Fig. 2A), except for the AtGLR1.4 LBD model, where all exposed loops have a low quality score.

| Target protein | UniProtKB entry <sup>a</sup> | Araport identifier <sup>b</sup> | % id <sup>c</sup> | GMQE <sup>d</sup> | QMEAN Z-score <sup>e</sup> | MolProbity score <sup>f</sup> |
|----------------|------------------------------|---------------------------------|-------------------|-------------------|----------------------------|-------------------------------|
| AtGLR1.2 (LBD) | Q9LV72                       | AT5G48400                       | 31.2              | 0.67              | -2.32                      | 2.14                          |
| AtGLR1.4 (LBD) | Q8LGN1                       | AT3G07520                       | 32.1              | 0.65              | -3.97                      | 2.43                          |
| AtGLR3.1 (LBD) | Q7XJL2                       | AT2G17260                       | 65.1              | 0.83              | -0.42                      | 1.56                          |
| AtGLR3.4 (LBD) | Q8GXJ4                       | AT1G05200                       | 61.5              | 0.81              | -0.95                      | 1.82                          |
| AtGLR3.5 (LBD) | Q9SW97                       | AT2G32390                       | 60.3              | 0.82              | 0.12                       | 1.62                          |

618  
619  
620  
621  
622  
623  
624  
625  
626  
627  
628  
629  
630  
631  
632

<sup>a</sup> UniProt: <https://www.uniprot.org/>

<sup>b</sup> Araport: <https://www.araport.org/>

<sup>c</sup> % sequence identity with GLR3.3 LBD

<sup>d</sup> Global Model Quality Estimation (number between 0 and 1) is a quality estimation which combines properties from the target–template alignment and coverage of the target.

<sup>e</sup> The QMEAN Z-score indicates how far the QMEAN score (54) of the model is from what one would expect from experimental structures of similar size. QMEAN Z-scores around zero indicate good agreement between the model structure and experimental structures of similar size. Scores of -4.0 or below indicate low quality of the model. The QMEAN score itself estimates global and local quality of geometry in one single model.

<sup>f</sup> Combines the clashscore, rotamer and Ramachandran evaluations giving one number that reflects the crystallographic resolution at which those values would be expected; from the server *MolProbity* (45).

633  
634  
635  
636  
637  
638  
639  
640  
641  
642  
643  
644

645 **SI REFERENCES**

- 646 1. Krebs M, et al. (2012) FRET-based genetically encoded sensors allow high-resolution live cell  
647 imaging of Ca<sup>2+</sup> dynamics. *Plant J* 69(1):181–192.
- 648 2. Costa A, Candeo A, Fieramonti L, Valentini G, Bassi A (2013) Calcium Dynamics in Root Cells  
649 of *Arabidopsis thaliana* Visualized with Selective Plane Illumination Microscopy. *PLoS One*  
650 8(10):e75646.
- 651 3. Candeo A, Doccula FG, Valentini G, Bassi A, Costa A (2017) Light Sheet Fluorescence  
652 Microscopy Quantifies Calcium Oscillations in Root Hairs of *Arabidopsis thaliana*. *Plant Cell*  
653 *Physiol* 58(7):1161–1172.
- 654 4. Qi Z, Stephens NR, Spalding EP (2006) Calcium Entry Mediated by GLR3.3, an *Arabidopsis*  
655 Glutamate Receptor with a Broad Agonist Profile. *Plant Physiol* 142(3):963–971.
- 656 5. Tapken D, et al. (2013) A Plant Homolog of Animal Glutamate Receptors Is an Ion Channel  
657 Gated by Multiple Hydrophobic Amino Acids. *Sci Signal* 6(279):ra47.  
658 doi:10.1126/scisignal.2003762.
- 659 6. Stephens NR, Qi Z, Spalding EP (2007) Glutamate Receptor Subtypes Evidenced by  
660 Differences in Desensitization and Dependence on the GLR3.3 and GLR3.4 Genes. *Plant*  
661 *Physiol* 146(2):529–538.
- 662 7. Li F, et al. (2013) Glutamate Receptor-Like Channel3.3 Is Involved in Mediating Glutathione-  
663 Triggered Cytosolic Calcium Transients, Transcriptional Changes, and Innate Immunity  
664 Responses in *Arabidopsis*. *Plant Physiol* 162(3):1497–1509.
- 665 8. Vincill ED, Bieck AM, Spalding EP (2012) Ca<sup>2+</sup> Conduction by an Amino Acid-Gated Ion  
666 Channel Related to Glutamate Receptors. *Plant Physiol* 159(1):40–46.
- 667 9. Nguyen CT, Kurenda A, Stolz S, Chételat A, Farmer EE (2018) Identification of cell  
668 populations necessary for leaf-to-leaf electrical signaling in a wounded plant. *Proc Natl Acad*  
669 *Sci* 115(40):10178–10183.
- 670 10. Wudick MM, et al. (2018) CORNICHON sorting and regulation of GLR channels underlie  
671 pollen tube Ca<sup>2+</sup> homeostasis. *Science* 360(6388):533–536.
- 672 11. Brockie PJ, et al. (2013) Cornichons Control ER Export of AMPA Receptors to Regulate  
673 Synaptic Excitability. *Neuron* 80(1):129–42. doi: 10.1016/j.neuron.2013.07.028.
- 674 12. Cunningham KW, Fink GR (2015) Calcineurin inhibits VCX1-dependent H<sup>+</sup>/Ca<sup>2+</sup> exchange and  
675 induces Ca<sup>2+</sup> ATPases in *Saccharomyces cerevisiae*. *Mol Cell Biol* 16(5):2226–2237.
- 676 13. Yadav AK, et al. (2015) A rice tonoplast calcium exchanger, OsCCX2 mediates Ca<sup>2+</sup>/cation  
677 transport in yeast. *Sci Rep* 5:1–15. doi:10.1038/srep17117.
- 678 14. Corso M, Doccula FG, de Melo JRF, Costa A, Verbruggen N (2018) Endoplasmic reticulum-  
679 localized CCX2 is required for osmotolerance by regulating ER and cytosolic Ca<sup>2+</sup> dynamics in  
680 *Arabidopsis*. *Proc Natl Acad Sci* 115(15):3966–3971.
- 681 15. Clough SJ, Bent AF (1998) Floral dip: A simplified method for *Agrobacterium*-mediated  
682 transformation of *Arabidopsis thaliana*. *Plant J* 16(6):735–743.
- 683 16. Murashige T, Skoog F (1962) A revised medium for rapid growth and biosynthesis with  
684 tobacco tissue culture. *Physiol Plant* 15, 473–497. doi:10.1111/j.1399-3054.1962.tb08052.x
- 685 17. Behera S, Kudla J (2013) High-Resolution Imaging of Cytoplasmic Ca<sup>2+</sup> Dynamics in

- 686 *Arabidopsis* Roots. *Cold Spring Harb Protoc* 8(7):670–674.
- 687 18. Armada NR, et al. (2019) In Vivo Light Sheet Fluorescence Microscopy of Calcium  
688 Oscillations in *Arabidopsis thaliana*. *Calcium Signalling: Methods and Protocols, Methods in*  
689 *Molecular Biology*, eds Raffaello A, Vecellio Reane D (Springer Nature, Heidelberg), vol.  
690 1925, pp 87-101.
- 691 19. Maizel A, Von Wangenheim D, Federici F, Haseloff J, Stelzer EHK (2011) High-resolution live  
692 imaging of plant growth in near physiological bright conditions using light sheet  
693 fluorescence microscopy. *Plant J* 68(2):377–385.
- 694 20. Bonza MC, Luoni L, De Michelis MI (2004) Functional expression in yeast of an N-deleted  
695 form of At-ACA8, a plasma membrane Ca<sup>2+</sup>-ATPase of *Arabidopsis thaliana*, and  
696 characterization of a hyperactive mutant. *Planta* 218(5):814–823.
- 697 21. Waterhouse AM, Procter JB, Martin DMA, Clamp M, Barton GJ (2009) Jalview Version 2 - A  
698 multiple sequence alignment editor and analysis workbench. *Bioinformatics* 25(9):1189–  
699 1191.
- 700 22. Doublé S (1997) Preparation of Selenomethionyl Proteins for Phase Determination.  
701 *Methods Enzymol* 276:523–530. doi: 10.1016/S0076-6879(97)76075-0.
- 702 23. Jerabek-Willemsen M, et al. (2014) MicroScale Thermophoresis : Interaction analysis and  
703 beyond. *J Mol Struct* 1077:101–113. doi:10.1016/j.molstruc.2014.03.009.
- 704 24. Scheuermann TH, Padrick SB, Gardner KH, Brautigam CA (2016) On the acquisition and  
705 analysis of microscale thermophoresis data. *Anal Biochem* 496:79–93.  
706 doi:10.1016/j.ab.2015.12.013.
- 707 25. Seidel SAI, et al. (2012) Label-free microscale thermophoresis discriminates sites and affinity  
708 of protein-ligand binding. *Angew Chemie - Int Ed* 51(42):10656–10659.
- 709 26. Guijarro M, et al. (2012) ID29: a high-intensity highly automated ESRF beamline for  
710 macromolecular crystallography experiments exploiting anomalous scattering. *J*  
711 *Synchrotron Radiat* 19(3):455–461.
- 712 27. Winn MD, et al. (2011) Overview of the CCP4 suite and current developments. *Acta*  
713 *Crystallogr Sect D Biol Crystallogr* 67(4):235–242.
- 714 28. Kabsch W (2010) XDS. *Acta Crystallogr Sect D Biol Crystallogr* 66(2):125–132.
- 715 29. Evans PR, Murshudov GN (2013) How good are my data and what is the resolution? *Acta*  
716 *Crystallogr Sect D Biol Crystallogr* 69(7):1204–1214.
- 717 30. Karplus PA, Diederichs K (2012) Linking crystallographic model and data quality. *Science*  
718 336(6084):1030–1033.
- 719 31. Altschul SF, et al. (1997) Gapped BLAST and PSI-BLAST: A new generation of protein  
720 database search programs. *Nucleic Acids Res* 25(17):3389–3402.
- 721 32. Rychlewski L, Li W, Jaroszewski L, Godzik A (2010) Comparison of sequence profiles.  
722 Strategies for structural predictions using sequence information. *Protein Sci* 9(2):232–241.
- 723 33. Schuermann JP, Tanner JJ (2003) MRSAD: Using anomalous dispersion from S atoms  
724 collected at Cu K $\alpha$  wavelength in molecular-replacement structure determination. *Acta*  
725 *Crystallogr - Sect D Biol Crystallogr* 59(10):1731–1736.
- 726 34. Panjikar S, Parthasarathy V, Lamzin VS, Weiss MS, Tucker PA (2009) On the combination of

- 727 molecular replacement and single-wavelength anomalous diffraction phasing for automated  
728 structure determination. *Acta Crystallogr Sect D Biol Crystallogr* 65(10):1089–1097.
- 729 35. Potterton L, et al. (2018) CCP4i2: The new graphical user interface to the CCP4 program  
730 suite. *Acta Crystallogr Sect D Struct Biol* 74:68–84. doi:10.1107/S2059798317016035.
- 731 36. Skubák P, Pannu NS (2013) Automatic protein structure solution from weak X-ray data. *Nat*  
732 *Commun* 4:1–6. doi:10.1038/ncomms3777.
- 733 37. Cowtan K (2006) The Buccaneer software for automated model building. 1. Tracing protein  
734 chains. *Acta Crystallogr Sect D Biol Crystallogr* 62(9):1002–1011.
- 735 38. Bricogne G, Blanc E, Brandl M, Flensburg C, Keller P, Paciorek W, Roversi P, Sharff A, Smart  
736 OS, Vonrhein C, Womack TO (2017). BUSTER version 2.10.2. Cambridge, United Kingdom:  
737 Global Phasing Ltd.
- 738 39. Blanc E, et al. (2004) Refinement of severely incomplete structures with maximum  
739 likelihood in BUSTER-TNT. *Acta Crystallogr Sect D Biol Crystallogr* 60(12 I):2210–2221.  
740 doi:10.1107/S0907444904016427.
- 741 40. Adams PD, et al. (2010) PHENIX: A comprehensive Python-based system for macromolecular  
742 structure solution. *Acta Crystallogr Sect D Biol Crystallogr* 66(2):213–221.
- 743 41. Vagin A, Teplyakov A (2010) Molecular replacement with MOLREP. *Acta Crystallogr Sect D*  
744 *Biol Crystallogr* 66(1):22–25.
- 745 42. Murshudov GN, et al. (2011) REFMAC5 for the refinement of macromolecular crystal  
746 structures. *Acta Crystallogr Sect D Biol Crystallogr* 67(4):355–367.
- 747 43. Emsley P, Lohkamp B, Scott WG, Cowtan K (2010) Features and development of Coot . *Acta*  
748 *Crystallogr Sect D Biol Crystallogr* 66(4):486–501.
- 749 44. Morris RJ, Perrakis A, Lamzin VS (2003) ARP/wARP and automatic interpretation of protein  
750 electron density maps. *Methods Enzymol* 374:229–44. doi: 10.1016/S0076-6879(03)74011-  
751 7.
- 752 45. Chen VB, et al. (2010) MolProbity: All-atom structure validation for macromolecular  
753 crystallography. *Acta Crystallogr Sect D Biol Crystallogr* 66(1):12–21.
- 754 46. Strong M, et al. (2006) Toward the structural genomics of complexes: Crystal structure of a  
755 PE/PPE protein complex from Mycobacterium tuberculosis. *Proc Natl Acad Sci*  
756 103(21):8060–8065.
- 757 47. Waterhouse A, et al. (2018) SWISS-MODEL: homology modelling of protein structures and  
758 complexes. *Nucleic Acids Res* 46(W1):W296–W303.
- 759 48. Tian W, Chen C, Lei X, Zhao J, Liang J (2018) CASTp 3.0: Computed atlas of surface  
760 topography of proteins. *Nucleic Acids Res* 46(W1):W363–W367.
- 761 49. Sievers F, et al. (2011) Fast, scalable generation of high-quality protein multiple sequence  
762 alignments using Clustal Omega. *Mol Syst Biol* 7:539. doi: 10.1038/msb.2011.75.
- 763 50. Robert X, Gouet P (2014) Deciphering key features in protein structures with the new  
764 ENDscript server. *Nucleic Acids Res* 42(W1):320–324.
- 765 51. De Bortoli S, Teardo E, Szabò I, Morosinotto T, Alboresi A (2016) Evolutionary insight into  
766 the ionotropic glutamate receptor superfamily of photosynthetic organisms. *Biophys Chem*  
767 218:14–26. doi:10.1016/j.bpc.2016.07.004.

- 768 52. Twomey EC, Yelshanskaya M V., Grassucci RA, Frank J, Sobolevsky AI (2016) Elucidation of  
769 AMPA receptor-stargazin complexes by cryo-electron microscopy. *Science* 353(6294):83–86.
- 770 53. McCoy AJ, et al. (2007) Phaser crystallographic software. *J Appl Crystallogr* 40(4):658–674.
- 771 54. Benkert P, Biasini M, Schwede T (2011) Toward the estimation of the absolute quality of  
772 individual protein structure models. *Bioinformatics* 27(3):343–350.
